1 **Collaborative metabolic curation of an emerging model marine bacterium, *Alteromonas***  
2 ***macleodii* ATCC 27126**

3  
4 Daniel Sher <sup>1\*#</sup>, Emma E. George <sup>2#</sup>, Matthias Wietz <sup>3,4,#</sup> Scott Gifford <sup>5,#</sup> Luca Zoccaratto <sup>6,7,#</sup>  
5 Osnat Weissberg <sup>1,#</sup> Coco Koedooder <sup>8,9,10</sup>, Waseem Bashir VK <sup>1</sup>, Marcelo Malisano Barreto Filho  
6 <sup>11</sup>, Raul Mireles <sup>12</sup>, Stas Malavin <sup>10,13</sup>, Michal Liddor Naim <sup>14</sup>, Tal Idan <sup>15</sup>, Vibhaw Shrivastava <sup>1</sup>,  
7 Lynne Itelson <sup>16</sup>, Dagan Sade <sup>15</sup>, Alhan Abu Hamoud <sup>1</sup>, Yara Soussan <sup>1</sup>, Noga Barak <sup>1</sup>, Peter Karp  
8 <sup>17</sup> and Lisa Moore <sup>17,#</sup>.

9  
10 1 Department of Marine Biology, Leon H. Charney School of Marine Sciences, University of Haifa,  
11 Israel

12 2 Integrative Oceanography Division, Scripps Institution of Oceanography, University of  
13 California, San Diego, La Jolla, California, USA

14 3 Alfred Wegener Institute Helmholtz Centre for Polar and Marine Research, Bremerhaven,  
15 Germany

16 4 Max Planck Institute for Marine Microbiology, Bremen, Germany

17 5 Department of Earth, Marine and Environmental Sciences, The University of North Carolina at  
18 Chapel Hill, Chapel Hill, NC, USA

19 6 Institute of Computational Biology, University of Natural Resources and Life Sciences, Vienna,  
20 Austria

21 7 Core Facility Bioinformatics, University of Natural Resources and Life Sciences, Vienna, Austria

22 8 The Fredy and Nadine Herrmann Institute of Earth Sciences, Hebrew University of Jerusalem,  
23 Jerusalem, Israel

24 9 The Interuniversity Institute for Marine Sciences in Eilat, Eilat, Israel

25 10 Israel Oceanographic and Limnological Research, Haifa, Israel

26 11 University of Alabama at Birmingham, USA

27 12 Department of Plant Pathology and Microbiology, Robert H. Smith Faculty of Agriculture, Food  
28 and Environment, The Hebrew University of Jerusalem

29 13 Zuckerberg Institute for Water Research, Ben-Gurion University of the Negev, Beer-Sheva,  
30 Israel

31 14 Avram and Stella Goldstein-Goren Department of Biotechnology Engineering, Ben-Gurion  
32 University of the Negev, Beer-Sheva

33 15 Department of Biomolecular Sciences, The Weizmann Institute of Science, Rehovot, Israel

34 16 School of Zoology, Faculty of Life Sciences, Tel-Aviv University, Tel-Aviv, Israel

35 17 Bioinformatics Research Group, SRI International, Menlo Park, CA, USA

36

37 \* Corresponding author: [dsher@univ.haifa.ac.il](mailto:dsher@univ.haifa.ac.il)

38 # These authors contributed equally to this work

39

40 **Running title:** Community curation of metabolism in *Alteromonas macleodii*

41

42 **Abstract**

43

44 Inferring the metabolic capabilities of an organism from its genome is a challenging process,  
45 relying on computationally-derived or manually curated metabolic networks. Manual curation can  
46 correct mistakes in the draft network and add missing reactions based on the literature, but  
47 requires significant expertise and is often the bottleneck for high-quality metabolic  
48 reconstructions. Here, we present a synopsis of a community curation workshop for the emerging  
49 model marine bacterium *Alteromonas macleodii* ATCC 27126 and its genome database in  
50 BioCyc, focusing on pathways for utilizing organic carbon and nitrogen sources. Due to the  
51 scarcity of biochemical information or gene knock-outs, the curation process relied primarily on  
52 published growth phenotypes and bioinformatic analyses, including comparisons with related  
53 *Alteromonas* strains. We report full pathways for the utilization of the algal polysaccharides  
54 alginate and pectin in contrast to inconclusive evidence for one carbon metabolism and mixed  
55 acid fermentation, in accordance with the lack of growth on methanol and formate. Pathways for  
56 amino acid degradation are ubiquitous across *Alteromonas macleodii* strains, yet enzymes in the  
57 pathways for the degradation of threonine, tryptophan and tyrosine were not identified. Nucleotide  
58 degradation pathways are also partial in ATCC 27126. We postulate that demonstrated growth  
59 on nitrate as sole N source proceeds via a nitrate reductase pathway that is a hybrid of known  
60 pathways. Our evidence highlights the value of joint and interactive curation efforts, but also  
61 shows major knowledge gaps regarding *Alteromonas* metabolism. The manually-curated  
62 metabolic reconstruction is available as a “Tier-2” database on BioCyc.

63

## 64 **Importance**

65

66 Metabolic reconstructions are vital for the systemic understanding of an organism’s ecology. Here,  
67 we report the outcome of a collaborative, interactive curation workshop to build a curated  
68 “metabolic encyclopedia” for *Alteromonas macleodii* ATCC 27126, a marine heterotrophic  
69 bacterium with widespread occurrence. Curating pathways for polysaccharide degradation, one-  
70 carbon metabolism, and others closed major knowledge gaps, and identified further avenues of  
71 research. Our study highlights how the combination of bioinformatic, genomic and physiological  
72 evidence can be harvested into a detailed metabolic model, but also identifies challenges if little  
73 experimental data is available for support. Overall, we show how an interactive get-together by a  
74 diverse group of scientists can advance the ecological understanding of emerging model bacteria,  
75 with relevance for the entire scientific community.

76

77

## 78 **Keywords**

79 Metabolism, Metabolic model, Annotation, Manual curation, organic carbon, *Alteromonas*  
80 *macleodii*

81

82

## 83 **Introduction**

84 Metabolism, the complex network of (mostly enzymatic) reactions within and between cells,  
85 underlies life on Earth. Reconstructing the metabolic network of an organism based on genomic  
86 information remains a fundamental challenge in biology (Fang et al. 2020, Bernstein et al. 2021).  
87 For model organisms like *Escherichia coli*, decades of physiological, biochemical, molecular and

88 bioinformatic work have resulted in precise maps of cellular metabolism and its regulation (Fang  
89 et al. 2020). These maps and accompanying biological knowledge form an integrated  
90 “encyclopedia of the cell”, such as the EcoCyc database, helping to explore cell metabolism and  
91 interpret experimental results (Karp et al. 2023). Metabolic reconstructions also serve as basis for  
92 quantitative and mechanistic models of cell growth under different conditions (Fang et al. 2020).  
93 Curated metabolic databases are available for several medically and biotechnologically-relevant  
94 model bacteria (e.g. *Salmonella enterica* (Métris et al. 2017) and *Bacillus subtilis* (Pedreira et al.  
95 2021)) as well as for selected eukaryotic organisms such as *Saccharomyces cerevisiae*  
96 (<https://yeast.biocyc.org>), *Arabidopsis thaliana* (Mueller et al. 2003), and humans (Romero et al.  
97 2005). However, the vast majority of metabolic models for thousands of other organisms are  
98 derived purely from automatic pipelines for gene and pathway identification, without manual  
99 curation (e.g. (Arkin et al. 2018, Karlsten et al. 2018, Karp et al. 2019)).

100  
101 Although computational reconstructions are useful starting points for understanding cell  
102 metabolism, they are often incomplete or incorrect. For example, they may lack metabolic  
103 reactions encoded in the genome that were not identified by the computational pipelines that link  
104 genes to reactions and products. Furthermore, entire pathways can be incorrectly predicted  
105 (“false positives”) based on the presence of only some associated genes, especially if involved in  
106 multiple pathways (Bernstein et al. 2021). Additionally, computational reconstructions lack the  
107 supervision of a human curator, who can consider supporting experimental evidence.

108  
109 Manually curating a metabolic reconstruction, such as the “Tier-2” PGDBs (Pathway/Genome  
110 DataBase) available on BioCyc.org (Karp et al. 2019), comprises several stages. The initial  
111 metabolic model is computed from a published genome. In BioCyc, this is based on prior genome  
112 annotation using Pathway Tools (PTools) software (Karp et al. 2021) and MetaCyc (Caspi et al.  
113 2020) as the reference database for metabolic reactions. Gaps in the draft metabolic network are  
114 then filled by suggesting candidate genes (“pathway hole filling”, (Green et al. 2004)). For BioCyc  
115 this stage includes also the prediction of transport reactions (Lee et al. 2008) and operons, and  
116 imports protein features from UniProtKB (The\_UniProt\_Consortium 2022) and Protein Database  
117 (Burley et al. 2021). Finally, manual curation by one or more experienced curators includes  
118 correcting errors, updating gene and protein information, and summarizing the presence and  
119 function of enzymes, reactions and pathways based on the literature and experimental evidence.  
120 Supporting information includes gene knock-outs or mutants, enzymatic activity assays,  
121 transcriptomics and proteomics. The curation process also highlights needs for additional  
122 experimental verification of specific pathways. Because the manual curation process takes  
123 months to years, the BioCyc collection contains, as of November 2023, only 79 manually-curated  
124 (“Tier-1 and Tier-2”) PDGBs, compared to nearly 20,000 purely computationally generated ones  
125 (“Tier-3”). Thus, manual curation constitutes a significant bottleneck in consolidating knowledge  
126 on cellular metabolism, especially in emerging model organisms with environmental,  
127 biotechnological or medical potential, for which resources and data are limited.

128  
129 One way of facilitating high-quality metabolic reconstructions is the joint effort by a community of  
130 researchers, either as a decentralized effort to which curators contribute remotely, or as an in-  
131 person curation workshop (e.g. (Stein 2001, Elisk et al. 2006)). During the early days of genome

132 sequencing, such community efforts were relatively common (Stein 2001). Today, such efforts  
133 focus on annotating individual genes in eukaryotes, and are facilitated by web portals such as  
134 Apollo, Jbrowse, ORCAE, and G-OnRamp (Sterck et al. 2012, Buels et al. 2016, Dunn et al. 2019,  
135 Liu et al. 2019). Community annotation also serves to update the Gene Ontology database  
136 (Ramsey et al. 2021), and is an exciting way to involve undergraduates in bioinformatic research  
137 (e.g. (Hosmani et al. 2019, Jung et al. 2020) ).

138  
139 Building upon the community curation approach, and extending it from individual genes to  
140 metabolic pathways, we organized an in-person community curation for the metabolic  
141 reconstruction of the marine bacterium *Alteromonas macleodii* ATCC 27126 (herein referred to  
142 as ATCC 27126). *Alteromonas macleodii* belongs to the ecologically and physiologically diverse  
143 genus *Alteromonas*, which is ubiquitous in tropical and temperate oceans and often abundant on  
144 particles (Alonso-Sáez et al. 2007, Roth Rosenberg et al. 2021, Henríquez-Castillo et al. 2022,  
145 Wietz et al. 2022). *Alteromonas* are commonly associated with cyanobacteria (Morris et al. 2008,  
146 Biller et al. 2015, Hou et al. 2018, Kearney et al. 2021) and algae (Shibl et al. 2020, Cao et al.  
147 2021). *Alteromonas* strains are easily isolated and cultured, partly attributed to their rapid  
148 response to the availability of organic matter (McCarren et al. 2010, Tinta et al. 2023). Indeed, a  
149 single *Alteromonas* strain has been shown to be capable of metabolizing almost the entire labile  
150 pool of marine organic carbon (Pedler et al. 2014). Phylogenetic, genomic and evolutionary  
151 studies have highlighted how genetic traits are exchanged between *Alteromonas* strains through  
152 genomic islands and plasmids (e.g. (Ivars-Martinez et al. 2008, Lopez-Perez et al. 2012, Fadeev  
153 et al. 2016, López-Pérez et al. 2016, López-Pérez et al. 2017, Koch et al. 2020)). Some  
154 *Alteromonas* strains may also have biotechnological applications (e.g. (Mehta et al. 2014,  
155 Concórdio-Reis et al. 2021)). Therefore, *A. macleodii* constitutes a relevant model organism in  
156 marine microbiology and biological oceanography (Wietz et al. 2022). The type strain, ATCC  
157 27126, was isolated from surface seawater near Hawaii, and its physiology has been  
158 characterized in some detail (Baumann et al. 1972, Baumann et al. 1984).

159  
160 Here, we describe conceptual and technical aspects of the community curation effort, performed  
161 at the University of Haifa (Israel) in February 2023 (Figure 1A). We specifically discuss the type  
162 of evidence typically available for emerging model organisms (Figure 1B), and then describe the  
163 curation of phenotypic traits with relevance for the ecological dynamics of *A. macleodii* (Figure  
164 1C). We focused on pathways related to the uptake and utilization of carbon and nitrogen sources:  
165 1) polysaccharides and one carbon (C1) compounds, as well as mixed acid fermentation; 2)  
166 nitrate, nucleotides and amino acids.

167

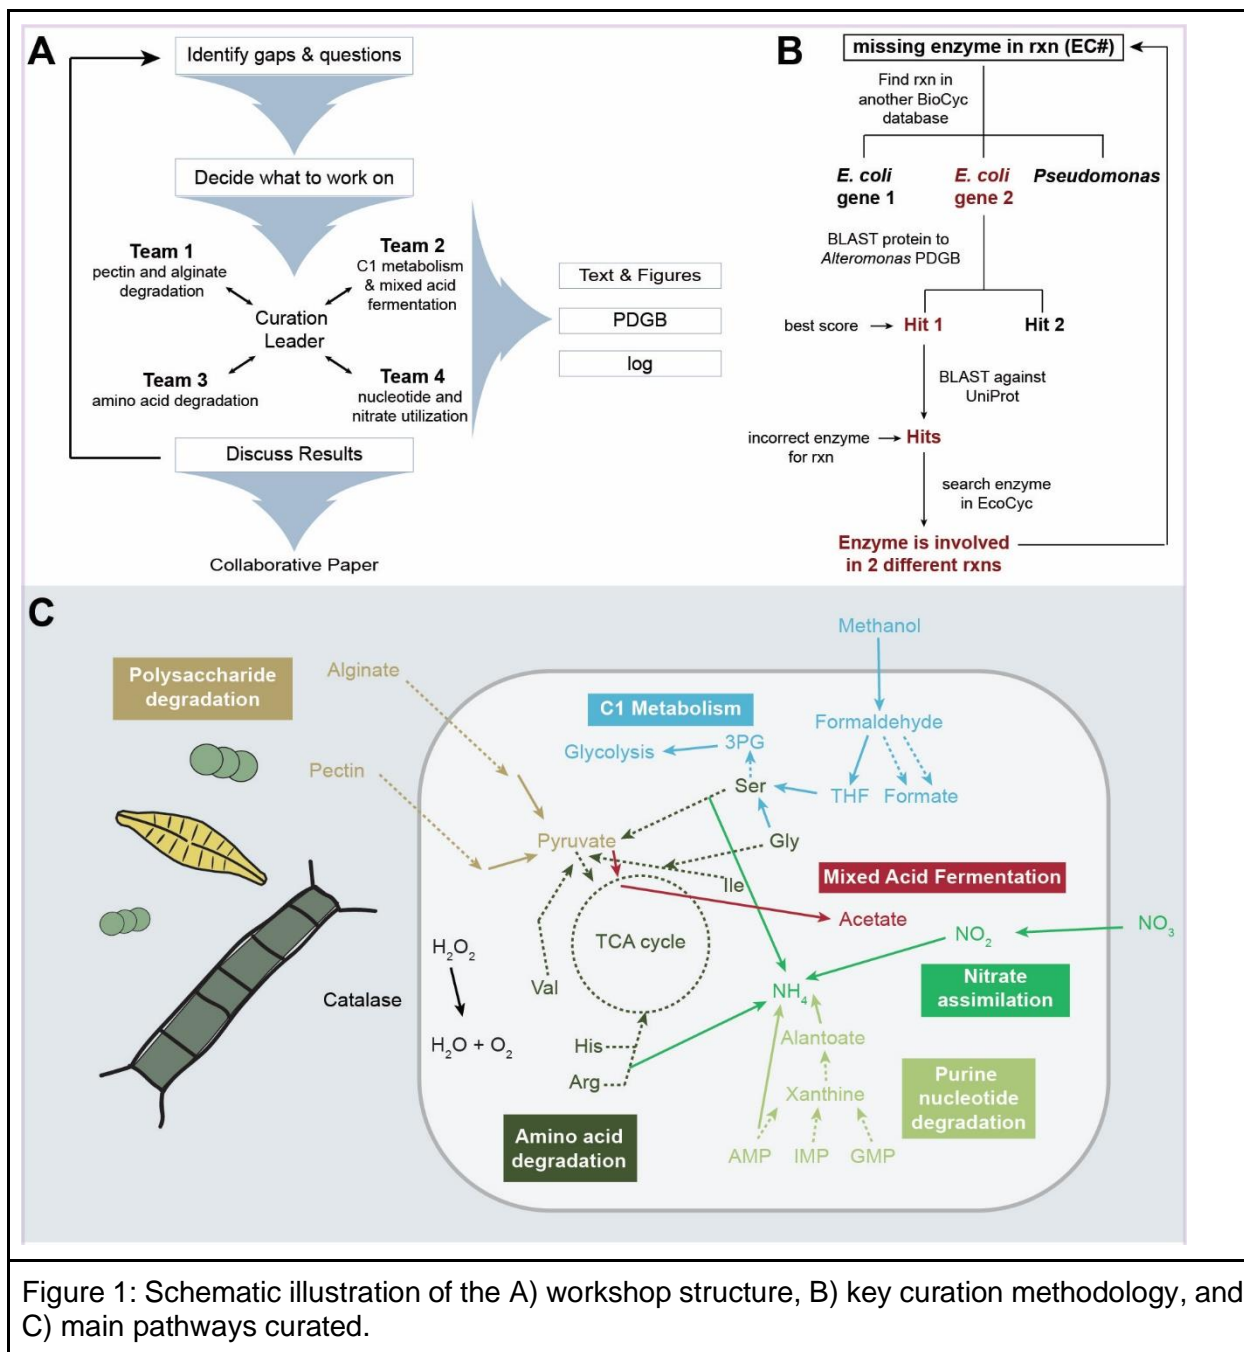

168

169

## 170 Metabolic curation – conceptual and technical aspects (Materials and Methods)

171

172 **Automated reconstruction by PathwayTools:** The starting point for the collaborative, manual  
173 curation process was a “Tier 3” PGDB, computationally derived by PathwayTools (Karp et al.  
174 2021). Briefly, PathwayTools builds upon a genome annotated with the NCBI RefSeq PGAP  
175 pipeline (Li et al. 2020) for consistency between PGDBs, but RAST (Aziz et al. 2008), PROKKA  
176 (Seemann 2014) or DOE’s JGI/IMG (Markowitz et al. 2009) have also been used. The PathoLogic

177 component of PathwayTools then generates the reactome, i.e. the set of enzyme-linked reactions,  
178 by mapping genes to enzymatic reactions in the MetaCyc reference knowledgebase (Caspi et al.  
179 2020) based on a combination of gene and/or gene product names, Enzyme Commission (EC)  
180 number and Gene Ontology (GO) terms, if included in the annotation (Karp et al. 2021). This  
181 evidence then allows inferring the presence of specific metabolic pathways, based on a likelihood  
182 score that considers the fraction of enzymes identified per pathway, the presence of pathway-  
183 specific enzymes, and the expected phylogenetic distribution (e.g. a plant-specific pathway  
184 suggested to be in a bacterium would be flagged and the score penalized). Only pathways above  
185 a defined threshold are considered. As genes with unknown functions are common in model  
186 organisms (e.g. 35% in *E. coli*; (Ghatak et al. 2019)) and even more in non-model organisms (up  
187 to 80%; (Zoccarato et al. 2022)), the pathway thresholding step is intentionally permissive. This  
188 allows pathways to be integrated into the predicted metabolic network even if enzymes are  
189 missing. Next, a pathway hole filler (PHFiller) within PathoLogic identified missing reactions, and  
190 attempts to fill these using a BLAST search with multiple candidate genes from UniProtKB (Green  
191 et al. 2004). The resulting PDGB includes a report showing the score and completeness for each  
192 pathway, pathway holes that were “filled”, and pathways with remaining holes. This enables  
193 assessing the quality of the metabolic reconstruction by the curators, and advises where to  
194 perform manual curation – representing a robust quality control of the predicted metabolic  
195 network, where available experimental evidence is added via comments and evidence codes.

196

197 **Community curation:** Manual curation of the ATCC 27126 metabolic network was mostly  
198 performed during a four-day workshop by diverse researchers, including graduate students,  
199 postdocs and PIs under the guidance of a BioCyc curator (Lisa Moore) (Figure 1A). All workshop  
200 participants are co-authors on this paper. Prior to the curation workshop, a five-day course  
201 introduced the fundamentals of metabolic reconstruction and downstream uses, e.g. interpreting  
202 ‘omics data in light of metabolism. The workshop participants decided on the priorities for curation,  
203 taking into account the research interest in *Alteromonas* as versatile utilizers of dissolved and  
204 particulate organic matter, and their interactions with phytoplankton. Subteams of 3-5 curators  
205 focused on the curation of one or more pathways using the BioCyc web tool (unpublished). Often,  
206 multiple pathways were combined for visual interpretation using the “Pathway collage” tool in  
207 BioCyc (Paley et al. 2016).

208

209 **Evidence types:** Most organisms whose PDGBs undergo manual curation are widely studied;  
210 often being genetically tractable and/or medically-important taxa. Such organisms usually have  
211 accompanying gene-specific information, such as knock-out phenotypes or biochemical assays  
212 with purified proteins. In contrast, emerging model organisms often lack such information, and  
213 may not be genetically tractable (e.g. *Prochlorococcus* strains MED4 and SS120 with Tier-2  
214 PDGBs available in BioCyc). ATCC 27126 was initially described in 1972 (Baumann et al.  
215 1972), yet knock-out phenotypes have been only described for genes encoding a nitrate  
216 reductase and siderophore synthesis proteins (Diner et al. 2016, Manck et al. 2022). As a result,  
217 we considered additional types of evidence for metabolic reconstruction. Firstly, we compiled a  
218 list of media on which ATCC 27126 can grow, based on published studies as well as  
219 experiments performed for the curation workshop (Supplementary Excel File). Since ATCC  
220 27126 can grow on minimal media with C, N, P and Fe sources but without amino acids,

221 vitamins or cofactors, complete pathways for producing these compounds must be present.  
222 Such information was added as metadata to the specific pathway descriptions in the PGDB.  
223 Secondly, we considered evidence from related *Alteromonas* strains. For example,  
224 polysaccharide utilization pathways were curated through comparison with *A. macleodii* 83-1, a  
225 model polysaccharide degrader with 98% average nucleotide identity to ATCC 27126 (Koch et  
226 al. 2019). Finally, we identified candidate genes filling a specific pathway hole using Reciprocal  
227 Best BLAST (RBBH, (Altenhoff et al. 2009), Fig. 1B), using candidate “hole filling” genes  
228 identified in MetaCyc or EcoCyc using the EC number for each missing reaction. The protein  
229 sequence (from *E. coli* or, if using MetaCyc, from the closest relative of *Alteromonas*) was then  
230 queried against the PGDB using BLASTP within BioCyc. The best hit in ATCC 27126 was  
231 queried against the UniProtKB/Swiss-Prot database (The\_UniProt\_Consortium 2022). A gene  
232 product in ATCC 27126 was considered as RBBH (i.e. fill a pathway hole) if the best hit in  
233 UniProtKB/Swiss-Prot was annotated as the same function or EC number as the initial  
234 MetaCyc/EcoCyc query. In some cases, additional information was considered, such as the  
235 specificity of the annotation (e.g. methanol dehydrogenase vs. dehydrogenase), or BLAST  
236 sequence similarity and query cover. For Figure 3C, multiple sequence alignments were  
237 performed using MAFFT (Kato et al. 2013). Phylogenetic analyses were also utilized, and  
238 maximum likelihood trees of *Alteromonas* alcohol dehydrogenases and 16S rRNA genes  
239 aligned with MUSCLE in AliView were inferred using IQ-TREE v1.5.4 (Edgar 2004, Larsson  
240 2014, Nguyen et al. 2014).

241  
242  
243

## 244 Results and discussion

245

246 The metabolic curation of *A. macleodii* ATCC 27126 was performed using a Tier-3 PDGB  
247 generated from NCBI genome assembly GCF\_000172635.2. The reactions and pathways were  
248 then curated as described above, resulting in a Tier-2 PDGB (Table 1). The supplementary Excel  
249 File provides a detailed log of all steps within the collaborative curation. Below we discuss each  
250 of the main pathways or processes curated (Figure 1C).

251

252 **Table 1 – Summary statistics of the curated Tier-2 PGDB of *Alteromonas macleodii* ATCC**  
253 **27126.**

|                      |       |
|----------------------|-------|
| Genes:               | 3,962 |
| Pathways:            | 244   |
| Enzymatic Reactions: | 1,492 |
| Transport Reactions: | 19    |
| Polypeptides:        | 3,829 |
| Protein Complexes:   | 49    |
| Enzymes:             | 915   |
| Transporters:        | 304   |
| Compounds:           | 1,029 |
| Transcription Units: | 2,659 |

|                   |       |
|-------------------|-------|
| tRNAs:            | 52    |
| Protein Features: | 6,181 |
| GO Terms:         | 4     |

254  
255  
256  
257

## 258 **Carbon sources**

259

## 260 **Carbohydrate-active enzymes and polysaccharide degradation**

261

262 ATCC 27126 encodes several pathways to degrade algal polysaccharides, important bacterial  
263 nutrient sources in the oceans. Degradation relies on polysaccharide lyases (PL), glycoside  
264 hydrolases (GH) and carbohydrate esterases (CE). These genes are mostly encoded in  
265 polysaccharide utilization loci (PULs), operon-like gene clusters with concerted regulation. Here,  
266 using complementary evidence, we curated the pathways for pectin and alginate degradation  
267 (Figure 2). We annotated genes encoding carbohydrate-active enzymes (CAZymes, (Zhang et al.  
268 2018, Drula et al. 2022)) in ATCC 27126 by comparison with transcriptomic and proteomic data  
269 from a closely related strain, *A. macleodii* 83-1. Both strains harbor homologous alginolytic and  
270 pectinolytic PULs (Neumann et al. 2015, Koch et al. 2019), which are significantly upregulated in  
271 83-1 when growing with an alginate and pectin mix (Koch et al. 2019).

272

273 For pectin degradation, we imported relevant degradation subpathways from MetaCyc and  
274 constructed a new pectin superpathway, PWY2OKO-5, encompassing depolymerization (via PL1,  
275 GH28 and GH105) and demethylation (via CE8 and CE12) (Figure 2). The resulting  
276 galacturonates are then processed via 4-deoxy-L-threo-hex-4-enopyranuronate (PWY-6507) and  
277 D-galacturonate (GALACTUROCAT-PWY) pathways respectively, which we added to the ATCC  
278 27126 PDGB. The released methanol is possibly metabolized by alcohol dehydrogenases (see  
279 below).

280

281 Curating the alginate degradation pathway benefited from RT-qPCR evidence in ATCC 27126,  
282 showing significantly higher expression of PL6 and PL7 lyases with alginate as sole nutrient  
283 source (Neumann et al. 2015). Biochemical assays in 83-1 with cloned, homologous enzymes  
284 confirmed alginate lyase activity, and characterized salinity and temperature optima (Gerlach  
285 2017)). However, structural elucidation failed, since not enough soluble enzyme was obtained  
286 (Gerlach 2017). Our curation process involved adding reactions for 4-deoxy-l-erythro-5-  
287 hexoseulose uronate (DEH) reductase (alginate degradation) as well as *kdgF* (both pathways),  
288 since uronate conversion does not occur spontaneously (Hobbs et al. 2016) as originally  
289 annotated in BioCyc (Figure 2).

290

291 Both pectin and alginate are composed of uronate sugars, eventually yielding pyruvate from 2-  
292 keto-3-deoxygluconate (KDG) and 2-dehydro-3-deoxy-D-gluconate 6-phosphate (KDPG, Figure  
293 2). Notably, KDG and KDPG are generated via pectin- or alginate-specific *kdgK* and *eda* genes  
294 encoded in the respective PULs for each polysaccharide. ATCC 27126 also encodes another *eda*



295 copy (MASE\_RS11155) not induced by pectin or alginate in 83-1, which might be a “generic”  
 296 variant to convert KDPG from other sources.

297  
 298  
 299

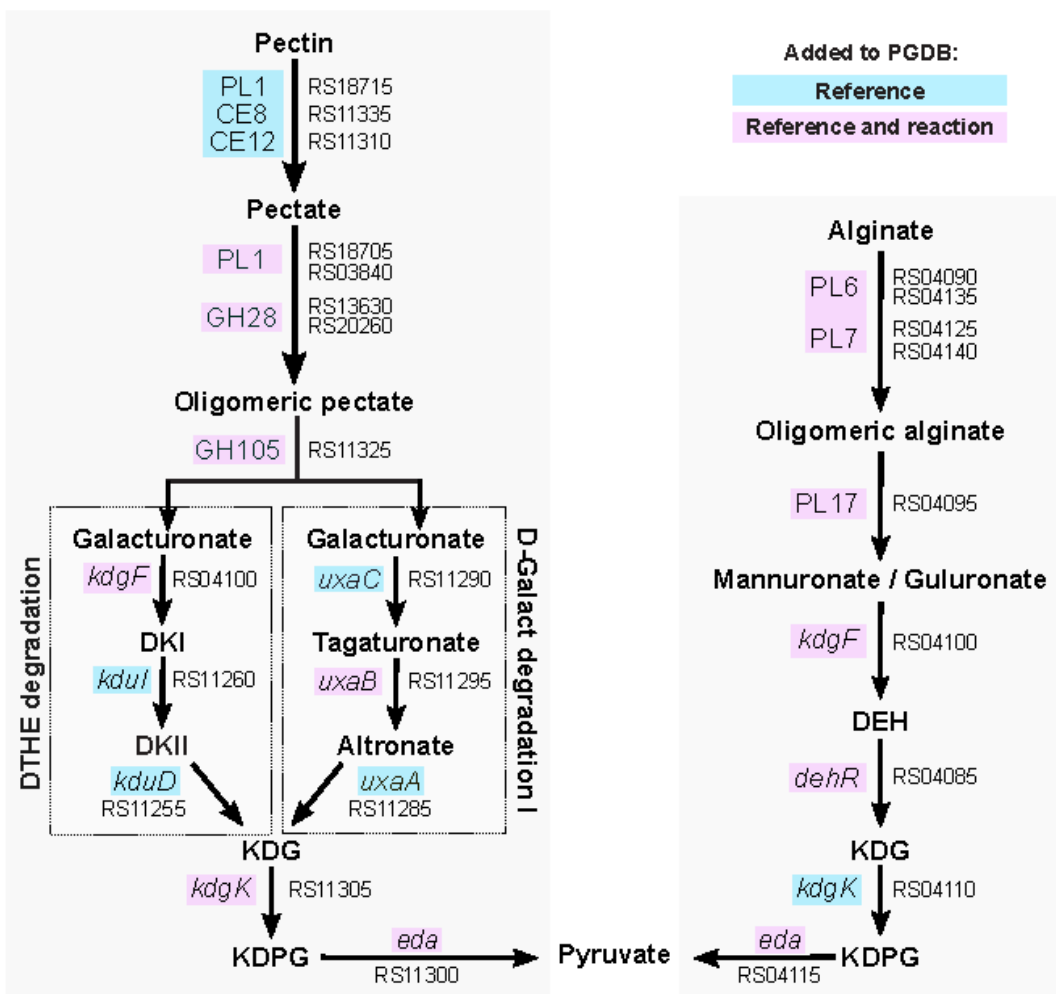

300  
 301  
 302  
 303  
 304  
 305  
 306  
 307  
 308  
 309  
 310  
 311

**Figure 2: Curated pectin and alginate degradation pathways.** The pectin superpathway (left; PWY2OKO-5) encompasses initial depolymerization and demethylation followed by 4-deoxy-L-threo-hex-4-enopyranuronate degradation (PWY-6507; abbreviated DTHE) or D-galacturonate degradation I (GALACTUROCAT-PWY; abbreviated D-Galact) for unsaturated and saturated galacturonates respectively. Both pectin and alginate degradation (right; PWY-6986-1) eventually result in KDG, KDGP and pyruvate, but these metabolites are generated via dedicated enzymes. DKI: 5-keto-4-deoxyuronate; DKII: 2,5-diketo-3-deoxygluconate; DEH: 4-deoxy-l-erythro-5-hexoseulose uronate; KDG: 2-keto-3-deoxygluconate; KDPG: 2-dehydro-3-deoxy-D-gluconate 6-phosphate; us: unsaturated. Blue boxes indicate genes for which the reference information was

312 updated in the PDGB. Pink boxes indicate genes for which new reactions also were added. Gene  
313 names and locus tags are shown for each reaction.

314

### 315 **C1 metabolism**

316 One-carbon (C1) and methylated compounds are important bacterial substrates in the marine  
317 environment (Dixon et al. 2013, Lidbury et al. 2014). Here we examined the potential of ATCC  
318 27126 to metabolize methanol, formaldehyde (the central C1 intermediate), formate, and related  
319 cofactors and enzymes (Figure 3A).

320 **Methanol/Ethanol Dehydrogenases.** Methanol is commonly produced by phytoplankton and  
321 cyanobacteria (Mincer et al. 2016), but only some *A. macleodii* strains can grow on methanol.  
322 Several *A. macleodii* strains were isolated from *Trichodesmium* using media with methanol as the  
323 sole carbon source, attributed to pyrroloquinoline quionone (PQQ)-dependent alcohol  
324 dehydrogenases (ADHs) encoded in their genomes (Lee et al. 2017). In contrast, neither ATCC  
325 27126 nor 83-1 grow on methanol (Baumann et al. 1984, Koch et al. 2019), although both encode  
326 the same PQQ-dependent ADH genes (Figure 3B). ATCC 27126 and 83-1 also encode an operon  
327 (*pqqABCDE*) with the dehydrogenase PQQ cofactor, which was identified using mass  
328 spectrometry in 83-1 (Koch et al. 2019). Our phylogenetic analysis of predicted PQQ-dependent  
329 ADH genes did not support their potential role in methanol oxidation (Figure 3C): MASE\_RS15405  
330 is within a clade of general ADHs that could potentially mediate methanol oxidation, while  
331 MASE\_RS05355 is more related to ethanol dehydrogenases. Additionally, both genes show only  
332 moderate amino acid identity (30%) with the known PQQ-dependent methanol dehydrogenases  
333 XoxF and MxaF (Keltjens et al. 2014). These ADHs might alternatively convert ethanol to  
334 acetaldehyde; indeed, ATCC 27176 was shown to grow on ethanol (Baumann et al. 1984).

335

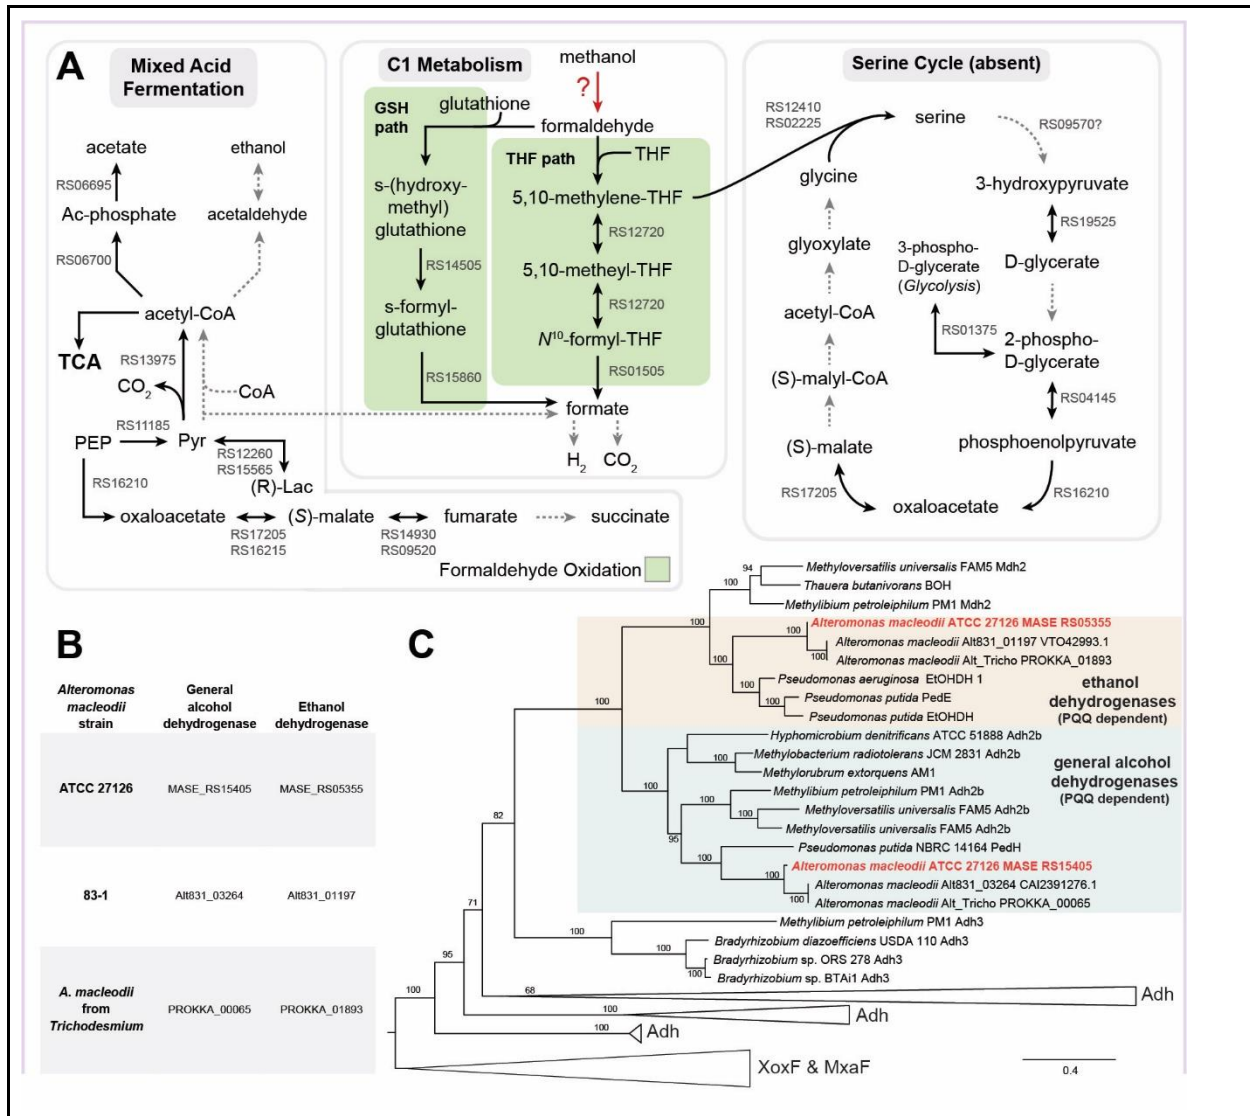

Figure 3: C1 metabolism, the serine cycle and mixed acid fermentation in *A. macleodii* ATCC 27126. A) Potential routes for one-carbon and methylated compounds. Bold arrows represent reactions identified in the ATCC 27126 genome, dotted arrows are missing reactions. THF: Tetrahydrofolate; Lac: lactate; Pyr: pyruvate; PEP: phosphoenolpyruvate. B) Putative methanol/ethanol dehydrogenase genes in *Alteromonas* strains that grow and do not grow on methanol. C) Maximum likelihood tree (IQ-TREE) inferred under the Q.pfam+F+I+G4 model from alcohol dehydrogenase proteins from ATCC 27126 and other strains. Support values represent 100 bootstrap pseudoreplicates.

336 ATCC 27126 also encodes a zinc-dependent ADH (MASE\_RS02430) and three iron-containing  
 337 ADHs (MASE\_RS06555, MASE\_RS01350, MASE\_RS11390). Iron- and zinc- containing ADHs  
 338 can catalyze the oxidation of methanol, ethanol, and other alcohols (e.g. (Vries et al. 1992,  
 339 Antoine et al. 1999, Liu et al. 2009)), although some of these enzymes may preferentially catalyze  
 340 the reverse reaction (i.e. reduction; see mixed acid fermentation below). Alternatively, both  
 341 ethanol and methanol can be converted to acetaldehyde and formaldehyde, respectively, during  
 342 hydrogen peroxide detoxification by catalase and related enzymes (e.g. (Ro et al. 2003)). ATCC

343 27126 encodes five catalase genes that potentially mediate interactions with phytoplankton  
344 (Hennon et al. 2017), yet it is unclear whether this pathway (primarily for detoxification) produces  
345 significant energy to support growth.

346 In summary, despite finding several candidate genes for methanol oxidation, it remains unclear  
347 why ATCC 27126 does not grow on methanol while other strains do. Potentially, ATCC 27126  
348 can metabolize methanol, but not grow on it as a sole C source. The same has been shown for  
349 *Pelagibacter*, which encodes multiple genes involved in C1 metabolism (including ADHs),  
350 oxidizes methanol and other C1 compounds to CO<sub>2</sub>, yet does not incorporate C1 compounds into  
351 biomass (Sun et al. 2011). Therefore, varying abilities between *A. macleodii* strains in their ability  
352 to utilize methanol may be due to different downstream oxidation steps.

353 **Formaldehyde Metabolism.** Formaldehyde is a common byproduct of methanol oxidation and a  
354 critical intermediate in C1 metabolism. It is also often cytotoxic and must be metabolized quickly.  
355 ATCC 27126 is predicted to encode two parallel routes for formaldehyde oxidation: the  
356 tetrahydrofolate-based (THF) and the glutathione-based (GSH) pathway (Figure 3A).

357 The THF pathway comprises four steps leading to formate; the first step is spontaneous (Kallen  
358 et al. 1966, Marx et al. 2003a) and the remaining three catalyzed (Müller et al. 2015). The product  
359 of the first step, 5,10-methylenetetrahydrofolate, can either enter the serine cycle (as in the  
360 methylotroph *Methylorubrum extorquens*, (Marx et al. 2003b)) or be converted into  
361 formyltetrahydrofolate (as in the facultative methylotroph *Bacillus methanolicus*, which lacks the  
362 serine cycle (Müller et al. 2015)). As discussed below, ATCC 27126 likely does not encode the  
363 serine cycle, suggesting the presence of dissimilatory formaldehyde conversion via the THF  
364 pathway, yielding formate.

365 The GSH pathway involves NAD, glutathione-dependent formaldehyde dehydrogenase (GSH-  
366 FDH, also called S-(hydroxymethyl)glutathione dehydrogenase), and S-formylglutathione  
367 hydrolase (FGH). S-(hydroxymethyl)glutathione, formed spontaneously by formaldehyde and  
368 glutathione, is the preferred *in vitro* and presumed *in vivo* substrate for GSH-FDH (Barber et al.  
369 1996, Harms et al. 1996). Both GSH-FDH and FGH are encoded in the ATCC 27126 genome  
370 (MASE\_RS14505 and MASE\_RS15860, respectively). ATCC 27126 may need both THF and  
371 GSH pathways for C1 metabolism and/or detoxification of formaldehyde, as in *Methylorubrum*  
372 *extorquens* (Marx et al. 2003b).

373 **Formate metabolism.** Formate from formaldehyde oxidation is usually oxidized to CO<sub>2</sub> (Maia et  
374 al. 2016), catalyzed by a formate hydrogen lyase complex (FHL) comprised of formate  
375 dehydrogenase *fdhF* and six subunits of hydrogenase 3. A BLAST search of *E. coli fdhF*  
376 (UniProt:P07658) showed several homologs in marine bacteria (mainly *Shewanella*), but no clear  
377 homolog in *Alteromonas*. An alternative route is the formate dehydrogenase operon (FDH), but  
378 we found only one of the four FDH genes (*fdhD*) in the ATCC 27126 genome. Although *fdhD* is  
379 encoded adjacent to another gene (MASE\_RS07820) distantly related to a formate  
380 dehydrogenase (~31% identical to *fdhH* from *E. coli*), MASE\_RS07820 is a pseudogene due to a  
381 frame shift. Therefore, ATCC 27126 presumably cannot oxidize formate to CO<sub>2</sub>.

382 Formate also participates in the glutamylation of tetrahydrofolate. Glutamylated folate cofactors  
383 are required in various C1 reactions, acting as carriers of one-carbon units (Shane 1989).  
384 However, the first enzyme in this reaction, formate-tetrahydrofolate ligase, is not encoded in the  
385 ATCC 27126 genome. The lack of key metabolic pathways supports the observation that *A.*  
386 *macleodii* cannot grow with formate as a sole carbon source (Baumann et al. 1972). Future work  
387 could determine whether ATCC 27126 excretes formate, similar to some methylotrophs (Baev et  
388 al. 1992) and cyanobacteria (Heyer et al. 1991, Bertilsson et al. 2005, Sosa et al. 2019), potentially  
389 providing a carbon source for co-occurring organisms.

390 **Serine Cycle.** Formaldehyde can also be assimilated via the serine cycle (formaldehyde  
391 assimilation I pathway in BioCyc), yielding several intermediates for central carbon metabolism  
392 ((Anthony 2011), Figure 3A). In the first step, hydroxymethyltransferase (GlyA) catalyzes the  
393 reaction of 5,10-methylenetetrahydrofolate with glycine to form serine. ATCC 27126 encodes two  
394 GlyA proteins (MASE\_RS12410 and MASE\_RS02225) along with a putative serine-glyoxylate  
395 transaminase (MASE\_RS09570), an enzyme that mediates the following conversion of serine to  
396 3-hydroxypyruvate. Hydroxypyruvate reductase to reduce 3-hydroxypyruvate to D-glycerate, was  
397 not identified in ATCC 27126. Instead, we found 2-hydroxyacid dehydrogenase  
398 (MASE\_RS19525), which also converts 3-hydroxypyruvate to D-glycerate. Genes encoding the  
399 remaining essential enzymes were not detected, including EC 6.2.1.9 and EC 4.1.3.24 that define  
400 the presence of the serine cycle in methylotrophs. This genomic evidence, along with the lack of  
401 growth on methanol as a sole carbon source (Koch et al. 2019) supports the absence of the serine  
402 cycle in ATCC 27126.

403

#### 404 **Mixed acid fermentation**

405 Mixed acid fermentation involves the catabolism of pyruvate to lactate, formate, acetate, ethanol  
406 and succinate when no exogenous electron acceptors are available. Marine particles, to which  
407 *Alteromonas* is often attached (e.g. (Mestre et al. 2017, Roth Rosenberg et al. 2021), potentially  
408 have microaerobic or anaerobic micro-niches (Bianchi et al. 2018), yet. ATCC 27126 has been  
409 described as strictly aerobic (Baumann et al. 1972). Mixed acid fermentation was inferred in  
410 ATCC 27126 during the computational reconstruction of PDGB, albeit with pathway holes. Hence,  
411 we decided to investigate this pathway further.

412

413 ATCC 27126 encodes 7 out of 11 enzymes for mixed acid fermentation, including those catalyzing  
414 the conversions of acetyl CoA to acetyl phosphate and acetate, pyruvate to lactate, as well as the  
415 formation of fumarate from phosphoenolpyruvate (PEP) (Figure 3A). The presence of these  
416 reactions is supported by detecting acetate, lactate and succinate in extracellular polysaccharides  
417 (EPS), where they act as non-carbohydrate substituents (Raguénès et al. 2003, Concórdio-Reis  
418 et al. 2021). However, ATCC 27126 does not encode a fumarate reductase enzyme. Thus,  
419 although traces of succinyl have been reported in *Alteromonas* EPS (Concórdio-Reis et al. 2021)  
420 and fumarate reduction can principally occur via succinate dehydrogenase (Cecchini et al. 2002),  
421 presence of mixed-acid fermentation in ATCC 27126 remains unclear. Moreover, ATCC 27126  
422 lacks the genes catalyzing the initial anaerobic conversion of pyruvate and CoA to acetyl-CoA

423 and formate (*pflB* and *tdcE* in *E. coli* K-12). As discussed above, it also lacks the formate  
424 dehydrogenase complex that catalyzes the sequential conversion of formate to CO<sub>2</sub>. Finally,  
425 ATCC 27126 lacks the canonical genes catalyzing the reduction of acetyl-CoA to acetaldehyde  
426 and ethanol. While, in principle, acetaldehyde could be reduced to ethanol by one of the PQQ- or  
427 zinc-dependent alcohol dehydrogenases (described above) working in reverse, the lack of an  
428 acetaldehyde dehydrogenase gene suggests that this part of mixed acid fermentation may be  
429 dysfunctional. Therefore, the bioinformatic evidence for the full mixed acid fermentation process  
430 is inconclusive. Nonetheless, many of these reactions also work in reverse (e.g., lactate  
431 dehydrogenase), and may enable ATCC 27126 to catabolize organic acids excreted by co-  
432 occurring algae even under oxic conditions (Bertilsson et al. 2005, Braakman et al. 2017). Indeed,  
433 ATCC 27126 can grow on lactate or pyruvate as sole carbon sources ((Baumann et al. 1984),  
434 Supplementary Excel file.

435

436

### 437 **Nitrogen sources**

438

#### 439 **Amino acid degradation**

440 Amino acids, constituting a significant fraction of organic nitrogen in the oceans (Lee et al. 2000),  
441 can serve as both nitrogen and carbon sources. ATCC 27126 grows well with peptides or a  
442 mixture of amino acids as sole carbon sources (Forchielli et al. 2022). Although comparative  
443 genomics suggested that most *Alteromonas* spp. can degrade almost every amino acid (Figure  
444 4A), ATCC 27126 growth was only reported on alanine and glycine (Baumann et al. 1984). We  
445 asked whether this inconsistency is due to missing genes in the predicted amino acid degradation  
446 pathways as they enter the TCA cycle (Figure 4B). For seven pathways with putative holes, we  
447 identified candidate genes for three pathways that could “close” these holes using RBBH  
448 (Supplementary Excel File). The putative “hole-filling” genes MASE\_RS07620 and  
449 MASE\_RS07610 are encoded within a predicted operon for L-leucine degradation, somewhat  
450 similar to the *liu* operon from *Pseudomonas aeruginosa* (Figure 4C, (Kazakov et al. 2009)). The  
451 predicted “hole-filling” gene MASE\_RS01650 is part of an operon for arginine degradation.  
452 However, we could not reconstruct the pathways for the degradation of threonine, tryptophan and  
453 tyrosine. Notably, there are holes in the pathways for tryptophan and tyrosine degradation in *E.*  
454 *coli* SIJ488, yet this strain can utilize these amino acids as sole nitrogen sources (Schulz-Mirbach  
455 et al. 2022). Therefore, these pathways might still be functional in ATCC 27126, although further  
456 experimental work is needed to test this hypothesis.

457

458

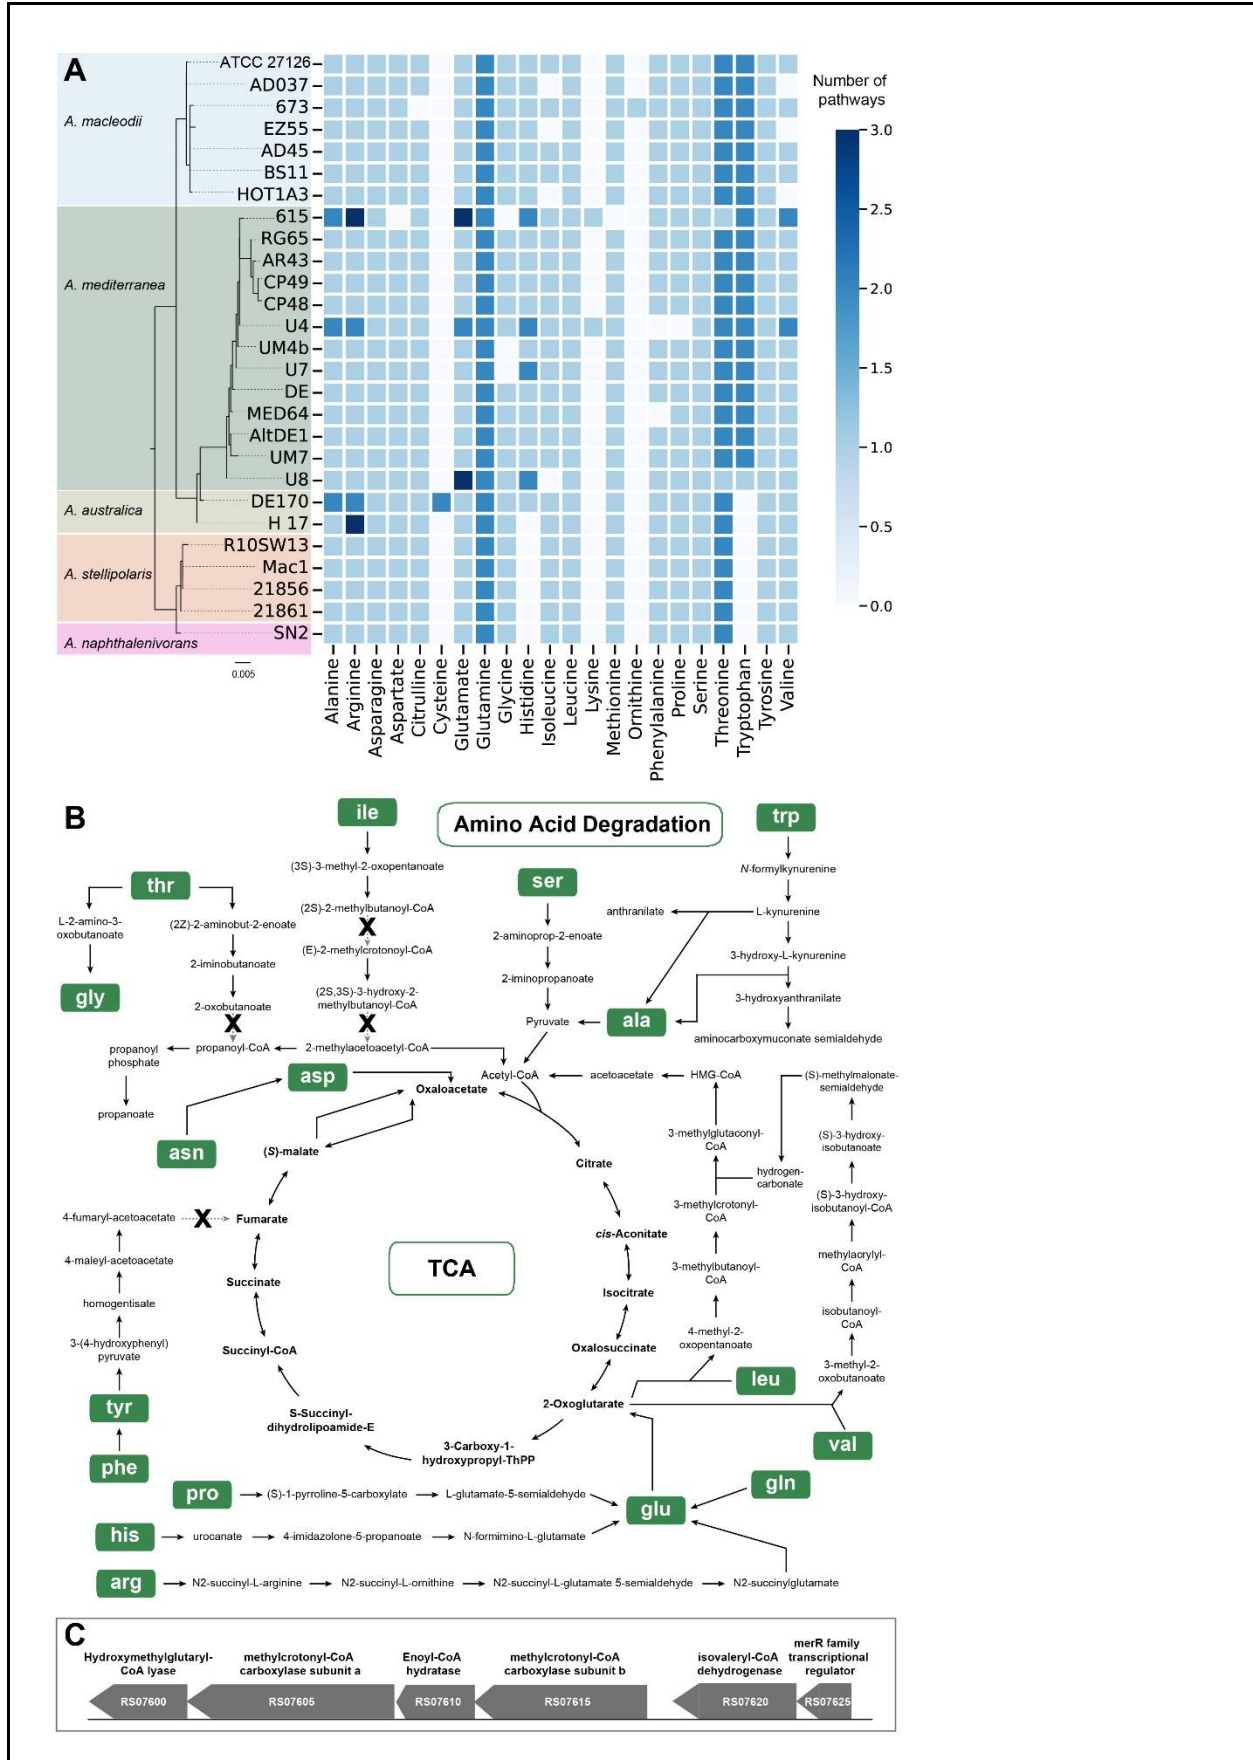

**Figure 4. Amino acid degradation pathways and their holes.** A) Number of predicted amino acid degradation pathways per genome across *Alteromonas* spp., determined using BioCyc's Comparative Genomics tool. The taxa are ordered based on a maximum likelihood tree (IQ-TREE) inferred under the TIM3+F+I model from full-length 16S rDNA. B) Amino acid utilization pathways in ATCC 27126, drawn based on an overview from the BioCyc "Pathway Collage" tool. Missing reactions ("pathway holes") are highlighted by an X. Methionine degradation is not shown as it enters the TCA cycle via multiple other pathways. C) Predicted operon for branched chain amino acid degradation, with similarities to the *liu* operon in *Pseudomonas aeruginosa* (Kazakov et al. 2009).

459

#### 460 **Nucleotide degradation**

461 Purine nucleotides can serve as nitrogen sources for bacteria (Huang et al. 2022). The purine  
462 nucleotide degradation II superpathway in MetaCyc is composed of three sequential pathways:  
463 1) purine nucleotide degradation II (starting with AMP, GMP and IMP each yielding urate); 2) urate  
464 conversion to allantoin; and 3) allantoin degradation (Figure 5A). The first pathway is fully present  
465 in ATCC 27126 (Figure 5A), whereas the second was not predicted despite finding genes  
466 encoding 2 out of 3 reactions. However, RBBH using the *puuD* gene from *Agrobacterium fabrum*  
467 identified MASE\_RS07125 as the putative hole-filling gene in the urate conversion to allantoin  
468 pathway, encoding a protein containing a urate oxidase domain (PF016181) (Figure 5B). We  
469 therefore curated the *puuD* gene, and added the missing urate conversion pathway.

470

471 Further metabolism of allantoin to glyoxylate can occur via S-ureidoglycine or S-ureidoglycolate  
472 (Figure 5A). However, these pathways are incomplete in ATCC 27126, and we were unable to  
473 identify hole-filling genes. Accordingly, ATCC 27126 cannot grow on allantoin as sole C source  
474 (Baumann et al. 1984). Taken together, the missing allantoin degradation pathway might explain  
475 why ATCC 27126 cannot grow on nucleotides as sole carbon source (Baumann et al. 1984).  
476 Nevertheless, there is a possibility that this strain can use purines as N sources, since ammonium  
477 is released at multiple steps of the degradation pathway. If so, we predict ATCC 27126 to excrete  
478 allantoin, allantoate and/or S-ureidoglycolate during nucleotide degradation.

479

480

481

482

483



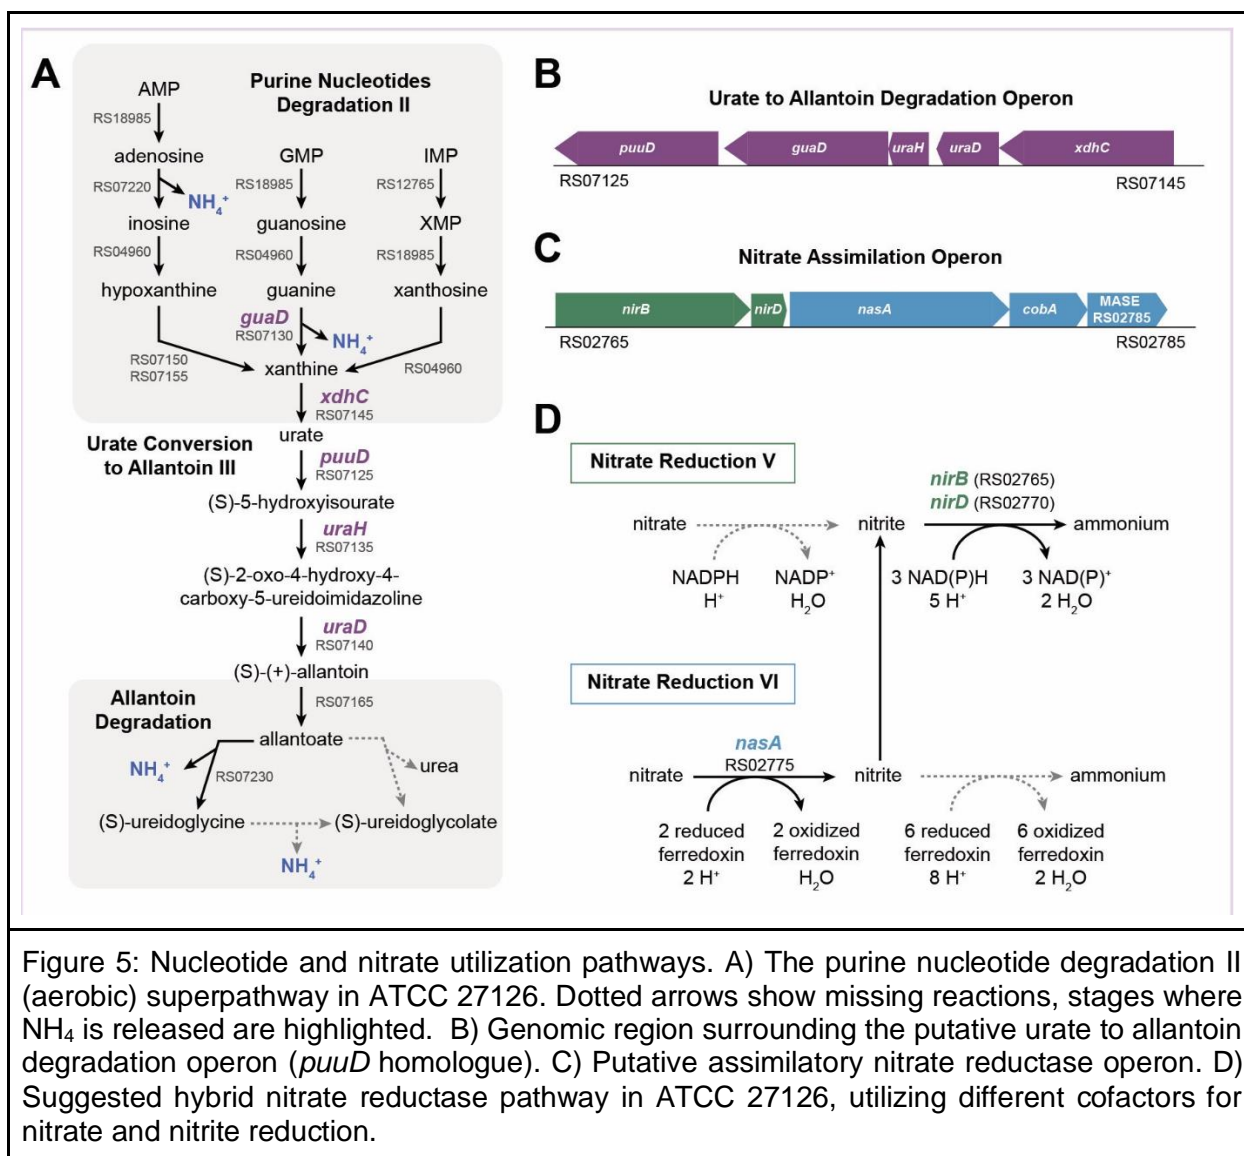

Figure 5: Nucleotide and nitrate utilization pathways. A) The purine nucleotide degradation II (aerobic) superpathway in ATCC 27126. Dotted arrows show missing reactions, stages where NH<sub>4</sub> is released are highlighted. B) Genomic region surrounding the putative urate to allantoin degradation operon (*puuD* homologue). C) Putative assimilatory nitrate reductase operon. D) Suggested hybrid nitrate reductase pathway in ATCC 27126, utilizing different cofactors for nitrate and nitrite reduction.

484

#### 485 Nitrate assimilation

486 ATCC 27126 can grow on nitrate as a sole N source, likely incorporated to biomass via  
 487 assimilatory reduction (Diner et al. 2016). The draft PDGB did not include assimilatory, but rather  
 488 dissimilatory, nitrate reduction (i.e. denitrification), via a cluster of one nitrate reductase (*nasA*;  
 489 MASE\_RS02775) and two nitrite reductase genes (*nirBD*, MASE\_RS02765 and  
 490 MASE\_RS02770; Figure 5C). A *nasA* mutant of ATCC 27126 cannot grow on nitrate, highlighting  
 491 that this operon encodes assimilatory nitrate reduction (Diner et al. 2016). Additionally, there is  
 492 no evidence for denitrification (Baumann et al. 1984), although distantly related Alteromonads  
 493 may respire nitrate (Moisander et al. 2018). Therefore, dissimilatory nitrate reduction was  
 494 removed from the PDGB.

495

496 The putative assimilatory nitrate reduction pathway in ATCC 27126 shows an unusual  
 497 combination of genes and required cofactors (Figure 5D). In most bacteria and fungi, nitrate and

498 nitrite reductases use NAD(P)H as electron donor (Lin et al. 1997), whereas cyanobacteria use  
499 ferredoxin (Herrero et al. 1997). The ATCC 27126 *nasA* is most similar to homologs of the nitrate  
500 reduction V pathway common to many bacteria and fungi (BLAST bit score 678). However no  
501 homolog was found for the *nasC* protein, often associated with *nasA* to form the nitrate reduction  
502 complex (Lin et al. 1997). The second best hit for *nasA* was to a cyanobacterial nitrate reductase  
503 *narB* (EC 1.7.7.2, BLAST bit score 607 with *narB* from *Synechococcus elongatus*), which does  
504 not require additional subunits, is closer in length and shares a ferredoxin-binding domain and 3  
505 molybdopterin-containing Pfam domains with *A. macleodii* ATCC 27126 *nasA*. We therefore  
506 propose that ATCC 27126 encodes a “chimeric” nitrate assimilation pathway, with a ferredoxin-  
507 utilizing homolog of the cyanobacterial nitrate reductase *narB* followed by NAD(P)H-utilizing  
508 bacterial homologs of the nitrite reductase *nirBD* complex. This hypothesis requires experimental  
509 verification.

510  
511

## 512 **Conclusions and future prospects**

513 Our interactive community curation contributes to the metabolic reconstruction of *Alteromonas*  
514 *macleodii* ATCC 27126 by combining bioinformatic, genomic and physiological evidence, together  
515 with an extensive literature review. This approach explored specific traits related to *Alteromonas*  
516 metabolism and ecology and provides recommendations for future experimental work.  
517 Formalizing this curation as a Tier-2 PDGB in BioCyc (PDGB ID: 2OKO, Nov 2023 version  
518 available freely on DOI <https://github.com/Sher-lab/amac/>) helps consolidating the biological  
519 understanding of *A. macleodii*, providing a dynamic and growing “metabolic encyclopedia”.

520

521 ATCC 27126 and other *A. macleodii* strains can utilize complex polysaccharides, but cannot grow  
522 on methanol or formate (Baumann et al. 1972, Baumann et al. 1984). The fate of pectin-derived  
523 methanol remains unclear, since the specificity of encoded ADHs could not be determined. If  
524 methanol can be metabolized to formaldehyde, the latter may either be fed into glycolysis for  
525 energy (but not biomass) production through a partial serine cycle or metabolized to formate  
526 which is probably excreted into the environment. Taken together, *A. macleodii* might hence show  
527 a “sharing” phenotype during pectin degradation, releasing simple organic compounds that can  
528 be metabolized by other bacteria (Fritts et al. 2021).

529

530 Some of the evidence supports the finding of *A. macleodii* in certain niches, but not in others. For  
531 example, polysaccharides degradation might support its association with algae and polymer  
532 microgels (Mitulla et al. 2016). Similarly, growth on peptides (Forchielli et al. 2022), together with  
533 their ability to utilize various forms of dissolved organic phosphorus (Srivastava et al. 2021), may  
534 support their growth on other forms of organic matter such as dead jellyfish biomass (Tinta et al.  
535 2023) or deep-sea particles (Zhao et al. 2020). In contrast, ATCC 27126 cannot grow on chitin,  
536 the most abundant polysaccharide in zooplankton (Baumann et al. 1984), and indeed  
537 *Alteromonas* are not part of the core copepod microbiome (Datta et al. 2018). Future curation  
538 efforts and accompanying experiments focusing on carbohydrate, protein and organophosphorus  
539 degradation may help clarifying the “metabolic niche” of *A. macleodii*, determine whether they are  
540 associated with specific organisms, and raise testable hypotheses regarding their spatial and  
541 temporal variability in the oceans (Alonso-Sáez et al. 2007, Roth Rosenberg et al. 2021).

542

543 The finding of *Alteromonas* on marine particles (Roth Rosenberg et al. 2021, Henríquez-Castillo  
544 et al. 2022, Wietz et al. 2022) might be connected to hypoxic or anoxic micro-niches (Bianchi et  
545 al. 2018), yet the evidence for fermentation in ATCC 27126 is inconclusive. We propose that a  
546 better characterization of the “oxygen niche” of *Alteromonas* will help to understand their  
547 involvement in particle colonization and degradation (Zhao et al. 2020). Similarly to understanding  
548 how *Alteromonas* utilizes amino acids, nucleotides or nitrate will contribute to understanding their  
549 role in nitrogen cycling, given that proteins can comprise 50-60% of phyto- and zooplankton  
550 biomass (Lee et al. 2000, Geider et al. 2002, Helland et al. 2003, Finkel et al. 2016, Givati et al.  
551 2023). Importantly, comparing cultured strains with environmental datasets will need to consider  
552 the diversity within the *Alteromonas* clade (e.g. (Gonzaga et al. 2012, López-Pérez et al. 2016,  
553 López-Pérez et al. 2017, Koch et al. 2020).

554

555 Our community curation clarified important aspects of the physiology and ecology of ATCC 27126,  
556 and suggested relevant experimental directions. However, we also highlight key challenges in  
557 studying ecologically important but less described organisms. Only a few *A. macleodii* genes have  
558 been functionally verified, resulting in often indirect evidence for the presence or absence of  
559 specific reactions. Deciding whether or not to include pathways in the PDGB was therefore  
560 sometimes subjective, especially if requiring “hole filling”. Furthermore, manual curation requires  
561 in-depth knowledge of multiple aspects of metabolism, which is typically beyond the expertise of  
562 any single curator or a diverse group like in our study. We suggest that any curation process  
563 clearly records the evidence used to decide whether a pathway is present, enabling future users  
564 to revisit the metabolic reconstruction before generating genome-scale models. Secondly, there  
565 are no clear guidelines for the incorporation of genomic information for metabolic reconstructions.  
566 While the conservation of (partial) pathways in closely related organisms may suggest they are  
567 functional, our results for amino acid utilization highlight that such hypotheses are not always fully  
568 supported. Furthermore, systematically addressing the correlation between pathway phylogeny  
569 and function may facilitate metabolic curation by harvesting experimental results from yet-  
570 uncultured organisms, e.g. using metagenome-assembled or single-cell genomes (Tinta et al.  
571 2023). Finally, a metabolic model widely accessible to the scientific community needs to be  
572 compatible with downstream analyses. There are currently several frameworks for representing  
573 cell metabolism, e.g. KEGG (Kanehisa et al. 2000) and modelSEED (Seaver et al. 2021), yet  
574 translating metabolic reconstructions from between frameworks can be difficult since terms and  
575 structure (e.g., where do they draw boundaries between pathways) are not compatible. Moreover,  
576 due to the cost of maintaining the BioCyc infrastructure, accessing most PDGBs requires  
577 payment. We hope that the insights from our community curation will provide incentives for  
578 research groups and funding agencies to include metabolic knowledge for environmentally  
579 important organisms in financially supported databases.

580

581 **Acknowledgements:** This study was supported by grant 1786/20 from the Israel Science  
582 Foundation (to DS) and the University of Haifa Data Science Research Center, Rectors office  
583 and International School. AM, PK and LM were supported by funding from SRI. EEG was  
584 supported by the Simons Foundation Postdoctoral Fellowship in Marine Microbial Ecology

585 (award ID: 993200). We thank Amanda Mackie for assistance with the annotation and Moran  
586 Altman for technical coordination.

587

588

589 **Author contributions:** DS and LM designed the workshop and study; all authors performed  
590 bioinformatics analyses and curated the PDGB; DS, EG, MW, SG, LZ, OW and LM wrote the  
591 manuscript with input from all authors.

592

593

## 594 **References**

595

596 Alonso-Sáez, L., V. Balagué, E. L. Sà, O. Sánchez, J. M. González, J. Pinhassi, R. Massana, J.  
597 Pernthaler, C. Pedrós-Alió and J. M. Gasol (2007). "Seasonality in bacterial diversity in north-  
598 west Mediterranean coastal waters: assessment through clone libraries, fingerprinting and  
599 FISH." *FEMS Microbiology Ecology* **60**(1): 98-112. [https://doi.org/10.1111/j.1574-](https://doi.org/10.1111/j.1574-6941.2006.00276.x)

600 6941.2006.00276.x

601 Altenhoff, A. M. and C. Dessimoz (2009). "Phylogenetic and Functional Assessment of  
602 Orthologs Inference Projects and Methods." *PLoS Computational Biology* **5**(1): e1000262.  
603 [10.1371/journal.pcbi.1000262](https://doi.org/10.1371/journal.pcbi.1000262)

604 Anthony, C. (2011). "How half a century of research was required to understand bacterial  
605 growth on C1 and C2 compounds; the story of the serine cycle and the ethylmalonyl-CoA  
606 pathway." *Sci Prog* **94**(Pt 2): 109-137. [10.3184/003685011x13044430633960](https://doi.org/10.3184/003685011x13044430633960)

607 Antoine, E., J.-L. Rolland, J.-P. Raffin and J. Dietrich (1999). "Cloning and over-expression in  
608 *Escherichia coli* of the gene encoding NADPH group III alcohol dehydrogenase from  
609 *Thermococcus hydrothermalis*." *European Journal of Biochemistry* **264**(3): 880-889.  
610 <https://doi.org/10.1046/j.1432-1327.1999.00685.x>

611 Arkin, A. P., R. W. Cottingham, C. S. Henry, N. L. Harris, R. L. Stevens, S. Maslov, P. Dehal, D.  
612 Ware, F. Perez, S. Canon, M. W. Sneddon, M. L. Henderson, W. J. Riehl, D. Murphy-Olson, S.  
613 Y. Chan, R. T. Kamimura, S. Kumari, M. M. Drake, T. S. Brettin, E. M. Glass, D. Chivian, D.  
614 Gunter, D. J. Weston, B. H. Allen, J. Baumohl, A. A. Best, B. Bowen, S. E. Brenner, C. C. Bun,  
615 J.-M. Chandonia, J.-M. Chia, R. Colasanti, N. Conrad, J. J. Davis, B. H. Davison, M. DeJongh,  
616 S. Devoid, E. Dietrich, I. Dubchak, J. N. Edirisinghe, G. Fang, J. P. Faria, P. M. Frybarger, W.  
617 Gerlach, M. Gerstein, A. Greiner, J. Gurtowski, H. L. Haun, F. He, R. Jain, M. P. Joachimiak, K.  
618 P. Keegan, S. Kondo, V. Kumar, M. L. Land, F. Meyer, M. Mills, P. S. Novichkov, T. Oh, G. J.  
619 Olsen, R. Olson, B. Parrello, S. Pasternak, E. Pearson, S. S. Poon, G. A. Price, S.

620 Ramakrishnan, P. Ranjan, P. C. Ronald, M. C. Schatz, S. M. D. Seaver, M. Shukla, R. A.  
621 Sutormin, M. H. Syed, J. Thomason, N. L. Tintle, D. Wang, F. Xia, H. Yoo, S. Yoo and D. Yu  
622 (2018). "KBase: The United States Department of Energy Systems Biology Knowledgebase."  
623 *Nature Biotechnology* **36**: 566. [10.1038/nbt.4163](https://doi.org/10.1038/nbt.4163)

624 <https://www.nature.com/articles/nbt.4163#supplementary-information>

625 Aziz, R. K., D. Bartels, A. A. Best, M. DeJongh, T. Disz, R. A. Edwards, K. Formsma, S. Gerdes,  
626 E. M. Glass, M. Kubal, F. Meyer, G. J. Olsen, R. Olson, A. L. Osterman, R. A. Overbeek, L. K.  
627 McNeil, D. Paarmann, T. Paczian, B. Parrello, G. D. Pusch, C. Reich, R. Stevens, O. Vassieva,  
628 V. Vonstein, A. Wilke and O. Zagnitko (2008). "The RAST Server: rapid annotations using  
629 subsystems technology." *BMC Genomics* **9**: 75. [10.1186/1471-2164-9-75](https://doi.org/10.1186/1471-2164-9-75)

630 Baev, M. V., N. L. Schklyar, L. V. Chistoserdova, A. Y. Chistoserdov, B. M. Polanuer, Y. D.  
631 Tsygankov and V. E. Sterkin (1992). "Growth of the obligate methylotroph *Methylobacillus*  
632 *flagellatum* under stationary and nonstationary conditions during continuous cultivation."  
633 *Biotechnology and Bioengineering* **39**(6): 688-695. <https://doi.org/10.1002/bit.260390614>

- 634 Barber, R. D., M. A. Rott and T. J. Donohue (1996). "Characterization of a glutathione-  
635 dependent formaldehyde dehydrogenase from *Rhodobacter sphaeroides*." Journal of  
636 Bacteriology **178**(5): 1386-1393. doi:10.1128/jb.178.5.1386-1393.1996
- 637 Baumann, L., P. Baumann, M. Mandel and R. D. Allen (1972). "Taxonomy of Aerobic Marine  
638 Eubacteria." Journal of Bacteriology **110**(1): 402-429. doi:10.1128/jb.110.1.402-429.1972
- 639 Baumann, P., L. Baumann, R. Bowditch and B. Beaman (1984). "Taxonomy of *Alteromonas*: *A.*  
640 *nigrifaciens* sp. nov., nom. rev.; *A. macleodii*; and *A. Haloplanktis*." International Journal of  
641 Systematic and Evolutionary Microbiology **34**. 10.1099/00207713-34-2-145
- 642 Bernstein, D. B., S. Sulheim, E. Almaas and D. Segrè (2021). "Addressing uncertainty in  
643 genome-scale metabolic model reconstruction and analysis." Genome Biology **22**(1): 64.  
644 10.1186/s13059-021-02289-z
- 645 Bertilsson, S., O. Berglund, M. J. Pullin and S. W. Chisholm (2005). "Release of dissolved  
646 organic matter by *Prochlorococcus*." Vie Et Milieu-Life and Environment **55**(3-4): 225-231.
- 647 Bianchi, D., T. S. Weber, R. Kiko and C. Deutsch (2018). "Global niche of marine anaerobic  
648 metabolisms expanded by particle microenvironments." Nature Geoscience **11**(4): 263-268.  
649 10.1038/s41561-018-0081-0
- 650 Biller, S. J., P. M. Berube, D. Lindell and S. W. Chisholm (2014). "Prochlorococcus: the  
651 structure and function of collective diversity." Nature Reviews Microbiology **13**: 13.  
652 10.1038/nrmicro3378
- 653 Biller, S. J., A. Coe, A.-B. Martin-Cuadrado and S. W. Chisholm (2015). "Draft Genome  
654 Sequence of *Alteromonas macleodii* Strain MIT1002, Isolated from an Enrichment Culture of the  
655 Marine Cyanobacterium *Prochlorococcus*." Genome Announcements **3**(4):  
656 10.1128/genomea.00967-00915. doi:10.1128/genomea.00967-15
- 657 Braakman, R., M. J. Follows and S. W. Chisholm (2017). "Metabolic evolution and the self-  
658 organization of ecosystems." Proceedings of the National Academy of Sciences **114**(15):  
659 E3091-E3100. 10.1073/pnas.1619573114
- 660 Buels, R., E. Yao, C. M. Diesh, R. D. Hayes, M. Munoz-Torres, G. Helt, D. M. Goodstein, C. G.  
661 Elsik, S. E. Lewis, L. Stein and I. H. Holmes (2016). "JBrowse: a dynamic web platform for  
662 genome visualization and analysis." Genome Biology **17**(1): 66. 10.1186/s13059-016-0924-1
- 663 Burley, S. K., C. Bhikadiya, C. Bi, S. Bittrich, L. Chen, G. V. Crichlow, C. H. Christie, K.  
664 Dalenberg, L. Di Costanzo, J. M. Duarte, S. Dutta, Z. Feng, S. Ganesan, D. S. Goodsell, S.  
665 Ghosh, R. K. Green, V. Guranović, D. Guzenko, B. P. Hudson, C. L. Lawson, Y. Liang, R. Lowe,  
666 H. Namkoong, E. Peisach, I. Persikova, C. Randle, A. Rose, Y. Rose, A. Sali, J. Segura, M.  
667 Sekharan, C. Shao, Y. P. Tao, M. Voigt, J. D. Westbrook, J. Y. Young, C. Zardecki and M.  
668 Zhuravleva (2021). "RCSB Protein Data Bank: powerful new tools for exploring 3D structures of  
669 biological macromolecules for basic and applied research and education in fundamental biology,  
670 biomedicine, biotechnology, bioengineering and energy sciences." Nucleic Acids Res **49**(D1):  
671 D437-d451. 10.1093/nar/gkaa1038
- 672 Cao, J.-Y., Y.-Y. Wang, M.-N. Wu, Z.-Y. Kong, J.-H. Lin, T. Ling, S.-M. Xu, S.-N. Ma, L. Zhang,  
673 C.-X. Zhou, X.-J. Yan and J.-L. Xu (2021). "RNA-seq Insights Into the Impact of *Alteromonas*  
674 *macleodii* on *Isochrysis galbana*." Frontiers in Microbiology **12**. 10.3389/fmicb.2021.711998
- 675 Caspi, R., R. Billington, I. M. Keseler, A. Kothari, M. Krummenacker, P. E. Midford, W. K. Ong,  
676 S. Paley, P. Subhraveti and P. D. Karp (2020). "The MetaCyc database of metabolic pathways  
677 and enzymes - a 2019 update." Nucleic Acids Res **48**(D1): D445-d453. 10.1093/nar/gkz862
- 678 Cecchini, G., I. Schröder, R. P. Gunsalus and E. Maklashina (2002). "Succinate dehydrogenase  
679 and fumarate reductase from *Escherichia coli*." Biochimica et Biophysica Acta (BBA) -  
680 Bioenergetics **1553**(1): 140-157. [https://doi.org/10.1016/S0005-2728\(01\)00238-9](https://doi.org/10.1016/S0005-2728(01)00238-9)
- 681 Concórdio-Reis, P., V. D. Alves, X. Moppert, J. Guézennec, F. Freitas and M. A. M. Reis (2021).  
682 "Characterization and Biotechnological Potential of Extracellular Polysaccharides Synthesized  
683 by *Alteromonas* Strains Isolated from French Polynesia Marine Environments." Marine Drugs  
684 **19**(9): 522.

685 Consortium, T. U. (2022). "UniProt: the Universal Protein Knowledgebase in 2023." Nucleic  
686 Acids Research **51**(D1): D523-D531. 10.1093/nar/gkac1052

687 Datta, M. S., A. A. Almada, M. F. Baumgartner, T. J. Mincer, A. M. Tarrant and M. F. Polz  
688 (2018). "Inter-individual variability in copepod microbiomes reveals bacterial networks linked to  
689 host physiology." The ISME Journal **12**(9): 2103-2113. 10.1038/s41396-018-0182-1

690 Diner, R. E., S. M. Schwenck, J. P. McCrow, H. Zheng and A. E. Allen (2016). "Genetic  
691 Manipulation of Competition for Nitrate between Heterotrophic Bacteria and Diatoms." Frontiers  
692 in Microbiology **7**(880). 10.3389/fmicb.2016.00880

693 Dixon, J. L., S. Sargeant, P. D. Nightingale and J. Colin Murrell (2013). "Gradients in microbial  
694 methanol uptake: productive coastal upwelling waters to oligotrophic gyres in the Atlantic  
695 Ocean." The ISME Journal **7**(3): 568-580. 10.1038/ismej.2012.130

696 Drula, E., M. L. Garron, S. Dogan, V. Lombard, B. Henrissat and N. Terrapon (2022). "The  
697 carbohydrate-active enzyme database: functions and literature." **50**(D1): D571-d577.  
698 10.1093/nar/gkab1045

699 Dunn, N. A., D. R. Unni, C. Diesh, M. Munoz-Torres, N. L. Harris, E. Yao, H. Rasche, I. H.  
700 Holmes, C. G. Elisk and S. E. Lewis (2019). "Apollo: Democratizing genome annotation." PLOS  
701 Computational Biology **15**(2): e1006790. 10.1371/journal.pcbi.1006790

702 Elisk, C. G., K. C. Worley, L. Zhang, N. V. Milshina, H. Jiang, J. T. Reese, K. L. Childs, A.  
703 Venkatraman, C. M. Dickens, G. M. Weinstock and R. A. Gibbs (2006). "Community annotation:  
704 Procedures, protocols, and supporting tools." Genome Research **16**(11): 1329-1333.  
705 10.1101/gr.5580606

706 Fadeev, E., F. De Pascale, A. Vezzi, S. Hübner, D. Aharonovich and D. Sher (2016). "Why  
707 close a bacterial genome? The plasmid of *Alteromonas macleodii* HOT1A3 is a vector for inter-  
708 specific transfer of a flexible genomic island." Frontiers in Microbiology **7**.  
709 10.3389/fmicb.2016.00248

710 Fang, X., C. J. Lloyd and B. O. Palsson (2020). "Reconstructing organisms in silico: genome-  
711 scale models and their emerging applications." Nature Reviews Microbiology **18**(12): 731-743.  
712 10.1038/s41579-020-00440-4

713 Finkel, Z. V., M. J. Follows, J. D. Liefer, C. M. Brown, I. Benner and A. J. Irwin (2016).  
714 "Phylogenetic Diversity in the Macromolecular Composition of Microalgae." PLOS ONE **11**(5):  
715 e0155977. 10.1371/journal.pone.0155977

716 Forchielli, E., D. Sher and D. Segrè (2022). "Metabolic Phenotyping of Marine Heterotrophs on  
717 Refactored Media Reveals Diverse Metabolic Adaptations and Lifestyle Strategies." mSystems  
718 **0**(0): e00070-00022. doi:10.1128/msystems.00070-22

719 Geider, R. J. and J. La Roche (2002). "Redfield revisited: variability of C : N : P in marine  
720 microalgae and its biochemical basis." European Journal of Phycology **37**(1): 1-17. Doi  
721 10.1017/S0967026201003456

722 Gerlach, N. (2017). Biochemical and structural analysis of marine polysaccharide lyases. MSc,  
723 Universität Bremen.

724 Ghatak, S., Z. A. King, A. Sastry and B. O. Palsson (2019). "The y-ome defines the 35% of  
725 *Escherichia coli* genes that lack experimental evidence of function." Nucleic Acids Res **47**(5):  
726 2446-2454. 10.1093/nar/gkz030

727 Givati, S., X. Yang, D. Sher and E. Rahav (2023). "Testing the growth rate and  
728 translation compensation hypotheses in marine bacterioplankton." Environmental Microbiology  
729 **n/a**(n/a). <https://doi.org/10.1111/1462-2920.16346>

730 Green, M. L. and P. D. Karp (2004). "A Bayesian method for identifying missing enzymes in  
731 predicted metabolic pathway databases." BMC Bioinformatics **5**: 76. 10.1186/1471-2105-5-76

732 Harms, N., J. Ras, W. N. Reijnders, R. J. v. Spanning and A. H. Stouthamer (1996). "S-  
733 formylglutathione hydrolase of *Paracoccus denitrificans* is homologous to human esterase D: a  
734 universal pathway for formaldehyde detoxification?" Journal of Bacteriology **178**(21): 6296-  
735 6299. doi:10.1128/jb.178.21.6296-6299.1996

736 Helland, S., B. F. Terjesen and L. Berg (2003). "Free amino acid and protein content in the  
737 planktonic copepod *Temora longicornis* compared to *Artemia franciscana*." *Aquaculture* **215**(1):  
738 213-228. [https://doi.org/10.1016/S0044-8486\(02\)00043-1](https://doi.org/10.1016/S0044-8486(02)00043-1)  
739 Hennon, G. M. M., J. J. Morris, S. T. Haley, E. R. Zinser, A. R. Durrant, E. Entwistle, T. Dokland  
740 and S. T. Dyhrman (2017). "The impact of elevated CO<sub>2</sub> on *Prochlorococcus* and microbial  
741 interactions with 'helper' bacterium *Alteromonas*." *The ISME Journal* **12**: 520.  
742 [10.1038/ismej.2017.189](https://doi.org/10.1038/ismej.2017.189)  
743 <https://www.nature.com/articles/ismej2017189#supplementary-information>  
744 Henríquez-Castillo, C., A. M. Plominsky, S. Ramírez-Flandes, A. D. Bertagnolli, F. J. Stewart  
745 and O. Ulloa (2022). "Metaomics unveils the contribution of *Alteromonas* bacteria to carbon  
746 cycling in marine oxygen minimum zones." *Frontiers in Marine Science* **9**.  
747 [10.3389/fmars.2022.993667](https://doi.org/10.3389/fmars.2022.993667)  
748 Heyer, H. and W. E. Krumbein (1991). "Excretion of fermentation products in dark and  
749 anaerobically incubated cyanobacteria." *Archives of Microbiology* **155**(3): 284-287.  
750 [10.1007/BF00252213](https://doi.org/10.1007/BF00252213)  
751 Hobbs, J. K., S. M. Lee, M. Robb, F. Hof, C. Barr, K. T. Abe, J.-H. Hehemann, R. McLean, D.  
752 W. Abbott and A. B. Boraston (2016). "KdgF, the missing link in the microbial metabolism of  
753 uronate sugars from pectin and alginate." *Proceedings of the National Academy of Sciences*  
754 **113**(22): 6188-6193. doi:10.1073/pnas.1524214113  
755 Hosmani, P. S., T. Shippy, S. Miller, J. B. Benoit, M. Munoz-Torres, M. Flores-Gonzalez, L. A.  
756 Mueller, H. Wiersma-Koch, T. D'Elia, S. J. Brown and S. Saha (2019). "A quick guide for  
757 student-driven community genome annotation." *PLOS Computational Biology* **15**(4): e1006682.  
758 [10.1371/journal.pcbi.1006682](https://doi.org/10.1371/journal.pcbi.1006682)  
759 Hou, S., M. López-Pérez, U. Pfreundt, N. Belkin, K. Stüber, B. Huettel, R. Reinhardt, I. Berman-  
760 Frank, F. Rodriguez-Valera and W. R. Hess (2018). "Benefit from decline: the primary  
761 transcriptome of *Alteromonas macleodii* str. Te101 during *Trichodesmium* demise." *The ISME*  
762 *Journal* **12**(4): 981-996. [10.1038/s41396-017-0034-4](https://doi.org/10.1038/s41396-017-0034-4)  
763 Huang, L., Y. Zhang, X. Du, R. An and X. Liang (2022). "Escherichia coli Can Eat DNA as an  
764 Excellent Nitrogen Source to Grow Quickly." *Frontiers in Microbiology* **13**.  
765 [10.3389/fmicb.2022.894849](https://doi.org/10.3389/fmicb.2022.894849)  
766 Ivars-Martinez, E., A.-B. Martin-Cuadrado, G. D'Auria, A. Mira, S. Ferreira, J. Johnson, R.  
767 Friedman and F. Rodriguez-Valera (2008). "Comparative genomics of two ecotypes of the  
768 marine planktonic copiotroph *Alteromonas macleodii* suggests alternative lifestyles associated  
769 with different kinds of particulate organic matter." *ISME J* **2**(12): 1194-1212.  
770 Jung, H., T. Ventura, J. S. Chung, W.-J. Kim, B.-H. Nam, H. J. Kong, Y.-O. Kim, M.-S. Jeon and  
771 S.-i. Eyun (2020). "Twelve quick steps for genome assembly and annotation in the classroom."  
772 *PLOS Computational Biology* **16**(11): e1008325. [10.1371/journal.pcbi.1008325](https://doi.org/10.1371/journal.pcbi.1008325)  
773 Kallen, R. G. and W. P. Jencks (1966). "The Mechanism of the Condensation of Formaldehyde  
774 with Tetrahydrofolic Acid." *Journal of Biological Chemistry* **241**(24): 5851-5863. [10.1016/S0021-  
775 9258\(18\)96350-7](https://doi.org/10.1016/S0021-9258(18)96350-7)  
776 Kanehisa, M. and S. Goto (2000). "KEGG: Kyoto Encyclopedia of Genes and Genomes."  
777 *Nucleic Acids Research* **28**(1): 27-30. [10.1093/nar/28.1.27](https://doi.org/10.1093/nar/28.1.27)  
778 Karlsen, E., C. Schulz and E. Almaas (2018). "Automated generation of genome-scale  
779 metabolic draft reconstructions based on KEGG." *BMC Bioinformatics* **19**(1): 467.  
780 [10.1186/s12859-018-2472-z](https://doi.org/10.1186/s12859-018-2472-z)  
781 Karp, P. D., R. Billington, R. Caspi, C. A. Fulcher, M. Latendresse, A. Kothari, I. M. Keseler, M.  
782 Krummenacker, P. E. Midford, Q. Ong, W. K. Ong, S. M. Paley and P. Subhraveti (2019). "The  
783 BioCyc collection of microbial genomes and metabolic pathways." *Brief Bioinform* **20**(4): 1085-  
784 1093. [10.1093/bib/bbx085](https://doi.org/10.1093/bib/bbx085)  
785 Karp, P. D., P. E. Midford, R. Billington, A. Kothari, M. Krummenacker, M. Latendresse, W. K.  
786 Ong, P. Subhraveti, R. Caspi, C. Fulcher, I. M. Keseler and S. M. Paley (2021). "Pathway Tools

787 version 23.0 update: software for pathway/genome informatics and systems biology." Brief  
788 Bioinform **22**(1): 109-126. 10.1093/bib/bbz104

789 Karp, P. D., S. Paley, R. Caspi, A. Kothari, M. Krummenacker, P. E. Midford, L. R. Moore, P.  
790 Subhraveti, S. Gama-Castro, V. H. Tierrafria, P. Lara, L. Muñiz-Rascado, C. Bonavides-  
791 Martinez, A. Santos-Zavaleta, A. Mackie, G. Sun, T. A. Ahn-Horst, H. Choi, M. W. Covert, J.  
792 Collado-Vides and I. Paulsen (2023). "The EcoCyc Database (2023)." EcoSal Plus **0**(0): eesp-  
793 0002-2023. doi:10.1128/ecosalplus.esp-0002-2023

794 Katoh, K. and D. M. Standley (2013). "MAFFT Multiple Sequence Alignment Software Version 7:  
795 Improvements in Performance and Usability." Molecular Biology and Evolution **30**(4): 772-780.  
796 10.1093/molbev/mst010

797 Kazakov, A. E., D. A. Rodionov, E. Alm, A. P. Arkin, I. Dubchak and M. S. Gelfand (2009).  
798 "Comparative Genomics of Regulation of Fatty Acid and Branched-Chain Amino Acid Utilization  
799 in Proteobacteria." Journal of Bacteriology **191**(1): 52-64. doi:10.1128/jb.01175-08

800 Kearney, S. M., E. Thomas, A. Coe and S. W. Chisholm (2021). "Microbial diversity of co-  
801 occurring heterotrophs in cultures of marine picocyanobacteria." Environmental Microbiome  
802 **16**(1): 1. 10.1186/s40793-020-00370-x

803 Keltjens, J. T., A. Pol, J. Reimann and H. J. Op den Camp (2014). "PQQ-dependent methanol  
804 dehydrogenases: rare-earth elements make a difference." Appl Microbiol Biotechnol **98**(14):  
805 6163-6183. 10.1007/s00253-014-5766-8

806 Koch, H., A. Dürwald, T. Schweder, B. Noriega-Ortega, S. Vidal-Melgosa, J.-H. Hehemann, T.  
807 Dittmar, H. M. Freese, D. Becher, M. Simon and M. Wietz (2019). "Biphasic cellular adaptations  
808 and ecological implications of *Alteromonas macleodii* degrading a mixture of algal  
809 polysaccharides." The ISME Journal **13**(1): 92-103. 10.1038/s41396-018-0252-4

810 Lee, C., S. G. Wakeham and J. I. Hedges (2000). "Composition and flux of particulate amino  
811 acids and chloropigments in equatorial Pacific seawater and sediments." Deep Sea Research  
812 Part I: Oceanographic Research Papers **47**(8): 1535-1568. [https://doi.org/10.1016/S0967-](https://doi.org/10.1016/S0967-0637(99)00116-8)  
813 [0637\(99\)00116-8](https://doi.org/10.1016/S0967-0637(99)00116-8)

814 Lee, M. D., N. G. Walworth, E. L. McParland, F.-X. Fu, T. J. Mincer, N. M. Levine, D. A.  
815 Hutchins and E. A. Webb (2017). "The *Trichodesmium* consortium: conserved heterotrophic co-  
816 occurrence and genomic signatures of potential interactions." The ISME Journal **11**(8): 1813-  
817 1824. 10.1038/ismej.2017.49

818 Lee, T. J., I. Paulsen and P. Karp (2008). "Annotation-based inference of transporter function."  
819 Bioinformatics **24**(13): i259-267. 10.1093/bioinformatics/btn180

820 Lemos, M. L., A. E. Toranzo and J. L. Barja (1985). "Modified Medium for the Oxidation-  
821 Fermentation Test in the Identification of Marine Bacteria." Applied and Environmental  
822 Microbiology **49**(6): 1541-1543. doi:10.1128/aem.49.6.1541-1543.1985

823 Li, W., K. R. O'Neill, D. H. Haft, M. DiCuccio, V. Chetvernin, A. Badretdin, G. Coulouris, F.  
824 Chitsaz, Myra K. Derbyshire, A. S. Durkin, N. R. Gonzales, M. Gwadz, Christopher J. Lanczycki,  
825 J. S. Song, N. Thanki, J. Wang, Roxanne A. Yamashita, M. Yang, C. Zheng, A. Marchler-Bauer  
826 and F. Thibaud-Nissen (2020). "RefSeq: expanding the Prokaryotic Genome Annotation  
827 Pipeline reach with protein family model curation." Nucleic Acids Research **49**(D1): D1020-  
828 D1028. 10.1093/nar/gkaa1105

829 Lidbury, I., J. C. Murrell and Y. Chen (2014). "Trimethylamine *N*-oxide metabolism by  
830 abundant marine heterotrophic bacteria." Proceedings of the National Academy of Sciences  
831 **111**(7): 2710-2715. doi:10.1073/pnas.1317834111

832 Liu, X., Y. Dong, J. Zhang, A. Zhang, L. Wang and L. Feng (2009). "Two novel metal-  
833 independent long-chain alkyl alcohol dehydrogenases from *Geobacillus thermodenitrificans*  
834 NG80-2." Microbiology **155**(6): 2078-2085. <https://doi.org/10.1099/mic.0.027201-0>

835 Liu, Y., L. Sargent, W. Leung, S. C. R. Elgin and J. Goecks (2019). "G-OnRamp: a Galaxy-  
836 based platform for collaborative annotation of eukaryotic genomes." Bioinformatics **35**(21):  
837 4422-4423. 10.1093/bioinformatics/btz309



838 Lopez-Perez, M., A. Gonzaga, A. B. Martin-Cuadrado, O. Onyshchenko, A. Ghavidel, R. Ghai  
839 and F. Rodriguez-Valera (2012). "Genomes of surface isolates of *Alteromonas macleodii*: the  
840 life of a widespread marine opportunistic copiotroph." *Sci Rep* **2**: 696. 10.1038/srep00696  
841 López-Pérez, M., N. Ramon-Marco and F. Rodriguez-Valera (2017). "Networking in microbes:  
842 conjugative elements and plasmids in the genus *Alteromonas*." *BMC Genomics* **18**(1): 36.  
843 10.1186/s12864-016-3461-0  
844 López-Pérez, M. and F. Rodriguez-Valera (2016). "Pangenome evolution in the marine  
845 bacterium *Alteromonas*." *Genome Biology and Evolution*. 10.1093/gbe/evw098  
846 Maia, L. B., L. Fonseca, I. Moura and J. J. G. Moura (2016). "Reduction of Carbon Dioxide by a  
847 Molybdenum-Containing Formate Dehydrogenase: A Kinetic and Mechanistic Study." *Journal of*  
848 *the American Chemical Society* **138**(28): 8834-8846. 10.1021/jacs.6b03941  
849 Manck, L. E., J. Park, B. J. Tully, A. M. Poire, R. M. Bundy, C. L. Dupont and K. A. Barbeau  
850 (2022). "Petrobactin, a siderophore produced by *Alteromonas*, mediates community iron  
851 acquisition in the global ocean." *The ISME Journal* **16**(2): 358-369. 10.1038/s41396-021-01065-  
852 y  
853 Markowitz, V. M., K. Mavromatis, N. N. Ivanova, I. M. Chen, K. Chu and N. C. Kyrpides (2009).  
854 "IMG ER: a system for microbial genome annotation expert review and curation." *Bioinformatics*  
855 **25**(17): 2271-2278. btp393 [pii]  
856 10.1093/bioinformatics/btp393  
857 Marx, C. J., L. Chistoserdova and M. E. Lidstrom (2003a). "Formaldehyde-Detoxifying Role of  
858 the Tetrahydromethanopterin-Linked Pathway in *Methylobacterium extorquens* AM1." *Journal of*  
859 *Bacteriology* **185**(24): 7160-7168. doi:10.1128/jb.185.23.7160-7168.2003  
860 Marx, C. J., M. Laukel, J. A. Vorholt and M. E. Lidstrom (2003b). "Purification of the Formate-  
861 Tetrahydrofolate Ligase from *Methylobacterium extorquens* AM1 and Demonstration of Its  
862 Requirement for Methylo-trophic Growth." *Journal of Bacteriology* **185**(24): 7169-7175.  
863 doi:10.1128/jb.185.24.7169-7175.2003  
864 McCarren, J., J. W. Becker, D. J. Repeta, Y. Shi, C. R. Young, R. R. Malmstrom, S. W.  
865 Chisholm and E. F. DeLong (2010). "Microbial community transcriptomes reveal microbes and  
866 metabolic pathways associated with dissolved organic matter turnover in the sea." *Proc Natl*  
867 *Acad Sci U S A* **107**(38): 16420–16427.  
868 Mehta, A., C. Sidhu, A. K. Pinnaka and A. Roy Choudhury (2014). "Extracellular polysaccharide  
869 production by a novel osmotolerant marine strain of *Alteromonas macleodii* and its application  
870 towards biomineralization of silver." *PLoS One* **9**(6): e98798. 10.1371/journal.pone.0098798  
871 Mestre, M., E. Borrull, M. M. Sala and J. M. Gasol (2017). "Patterns of bacterial diversity in the  
872 marine planktonic particulate matter continuum." *The ISME Journal* **11**(4): 999-1010.  
873 10.1038/ismej.2016.166  
874 Métris, A., P. Sudhakar, D. Fazekas, A. Demeter, E. Ari, M. Olbei, P. Branchu, R. A. Kingsley, J.  
875 Baranyi and T. Korcsmáros (2017). "SalmoNet, an integrated network of ten *Salmonella*  
876 *enterica* strains reveals common and distinct pathways to host adaptation." *npj Systems Biology*  
877 *and Applications* **3**(1): 31. 10.1038/s41540-017-0034-z  
878 Mincer, T. J. and A. C. Aicher (2016). "Methanol Production by a Broad Phylogenetic Array of  
879 Marine Phytoplankton." *PLOS ONE* **11**(3): e0150820. 10.1371/journal.pone.0150820  
880 Moisander, P. H., K. M. Shoemaker, M. C. Daley, E. McCliment, J. Larkum and M. A. Altabet  
881 (2018). "Copepod-Associated Gammaproteobacteria Breathe Nitrate in the Open Ocean  
882 Surface Layers." *Frontiers in Microbiology* **9**. 10.3389/fmicb.2018.02390  
883 Morris, J. J., R. Kirkegaard, M. J. Szul, Z. I. Johnson and E. R. Zinser (2008). "Facilitation of  
884 robust growth of *Prochlorococcus* colonies and dilute liquid cultures by "helper" heterotrophic  
885 bacteria." *Appl Environ Microbiol* **74**(14): 4530-4534.  
886 Mueller, L. A., P. Zhang and S. Y. Rhee (2003). "AraCyc: a biochemical pathway database for  
887 *Arabidopsis*." *Plant Physiol* **132**(2): 453-460. 10.1104/pp.102.017236

- 888 Müller, J. E. N., F. Meyer, B. Litsanov, P. Kiefer and J. A. Vorholt (2015). "Core pathways  
889 operating during methylotrophy of *Bacillus methanolicus* MGA3 and induction of a bacillithiol-  
890 dependent detoxification pathway upon formaldehyde stress." *Molecular Microbiology* **98**(6):  
891 1089-1100. <https://doi.org/10.1111/mmi.13200>
- 892 Neumann, A. M., J. P. Balmonte, M. Berger, H.-A. Giebel, C. Arnosti, S. Voget, M. Simon, T.  
893 Brinkhoff and M. Wietz (2015). "Different utilization of alginate and other algal polysaccharides  
894 by marine *Alteromonas macleodii* ecotypes." *Environmental Microbiology* **17**(10): 3857-3868.  
895 <https://doi.org/10.1111/1462-2920.12862>
- 896 Paley, S., P. E. O'Maille, D. Weaver and P. D. Karp (2016). "Pathway collages: personalized  
897 multi-pathway diagrams." *BMC Bioinformatics* **17**(1): 529. 10.1186/s12859-016-1382-1
- 898 Pedler, B. E., L. I. Aluwihare and F. Azam (2014). "Single bacterial strain capable of significant  
899 contribution to carbon cycling in the surface ocean." *Proceedings of the National Academy of*  
900 *Sciences* **111**(20): 7202-7207. 10.1073/pnas.1401887111
- 901 Pedreira, T., C. Eifmann and J. Stülke (2021). "The current state of SubtiWiki, the database for  
902 the model organism *Bacillus subtilis*." *Nucleic Acids Research* **50**(D1): D875-D882.  
903 10.1093/nar/gkab943
- 904 Raguénès, G., M. A. Cambon-Bonavita, J. F. Lohier, C. Boisset and J. Guezennec (2003). "A  
905 Novel, Highly Viscous Polysaccharide Excreted by an *Alteromonas* Isolated from a Deep-Sea  
906 Hydrothermal Vent Shrimp." *Current Microbiology* **46**(6): 0448-0452. 10.1007/s00284-002-3922-  
907 3
- 908 Ramsey, J., B. McIntosh, D. Renfro, S. A. Aleksander, S. LaBonte, C. Ross, A. E. Zweifel, N.  
909 Liles, S. Farrar, J. J. Gill, I. Erill, S. Ades, T. Z. Berardini, J. A. Bennett, S. Brady, R. Britton, S.  
910 Carbon, S. M. Caruso, D. Clements, R. Dalia, M. Defelice, E. L. Doyle, I. Friedberg, S. M. R.  
911 Gurney, L. Hughes, A. Johnson, J. M. Kowalski, D. Li, R. C. Lovering, T. L. Mans, F. McCarthy,  
912 S. D. Moore, R. Murphy, T. D. Paustian, S. Perdue, C. N. Peterson, B. M. Prüß, M. S. Saha, R.  
913 R. Sheehy, J. T. Tansey, L. Temple, A. W. Thorman, S. Trevino, A. C. Vollmer, V. Walbot, J.  
914 Willey, D. A. Siegele and J. C. Hu (2021). "Crowdsourcing biocuration: The Community  
915 Assessment of Community Annotation with Ontologies (CACAO)." *PLOS Computational Biology*  
916 **17**(10): e1009463. 10.1371/journal.pcbi.1009463
- 917 Reintjes, G., C. Arnosti, B. Fuchs and R. Amann (2019). "Selfish, sharing and scavenging  
918 bacteria in the Atlantic Ocean: a biogeographical study of bacterial substrate utilisation." *The*  
919 *ISME Journal* **13**(5): 1119-1132. 10.1038/s41396-018-0326-3
- 920 Ro, Y. T., H. I. Lee, E. J. Kim, J. H. Koo, E. Kim and Y. M. Kim (2003). "Purification,  
921 characterization, and physiological response of a catalase-peroxidase in *Mycobacterium* sp.  
922 strain JC1 DSM 3803 grown on methanol." *FEMS Microbiology Letters* **226**(2): 397-403.  
923 10.1016/s0378-1097(03)00644-x
- 924 Romero, P., J. Wagg, M. L. Green, D. Kaiser, M. Krummenacker and P. D. Karp (2005).  
925 "Computational prediction of human metabolic pathways from the complete human genome."  
926 *Genome Biol* **6**(1): R2. 10.1186/gb-2004-6-1-r2
- 927 Roth Rosenberg, D., M. Haber, J. Goldford, M. Lalzar, D. Aharonovich, A. Al-Ashhab, Y.  
928 Lehahn, D. Segrè, L. Steindler and D. Sher (2021). "Particle-associated and free-living bacterial  
929 communities in an oligotrophic sea are affected by different environmental factors."  
930 *Environmental Microbiology* *n/a*(n/a). <https://doi.org/10.1111/1462-2920.15611>
- 931 Satish Kumar, V., M. S. Dasika and C. D. Maranas (2007). "Optimization based automated  
932 curation of metabolic reconstructions." *BMC Bioinformatics* **8**(1): 212. 10.1186/1471-2105-8-212
- 933 Schulz-Mirbach, H., A. Müller, T. Wu, P. Pfister, S. Aslan, L. Schada von Borzyskowski, T. J.  
934 Erb, A. Bar-Even and S. N. Lindner (2022). "On the flexibility of the cellular amination network in  
935 *E. coli*." *eLife* **11**: e77492. 10.7554/eLife.77492
- 936 Seaver, S. M. D., F. Liu, Q. Zhang, J. Jeffryes, J. P. Faria, J. N. Edirisinghe, M. Mundy, N. Chia,  
937 E. Noor, M. E. Beber, A. A. Best, M. DeJongh, J. A. Kimbrel, P. D'Haeseleer, S. R. McCorkle, J.  
938 R. Bolton, E. Pearson, S. Canon, E. M. Wood-Charlson, R. W. Cottingham, A. P. Arkin and C.

- 939 S. Henry (2021). "The ModelSEED Biochemistry Database for the integration of metabolic  
940 annotations and the reconstruction, comparison and analysis of metabolic models for plants,  
941 fungi and microbes." Nucleic Acids Res **49**(D1): D575-d588. 10.1093/nar/gkaa746
- 942 Seemann, T. (2014). "Prokka: rapid prokaryotic genome annotation." Bioinformatics **30**(14):  
943 2068-2069. 10.1093/bioinformatics/btu153
- 944 Shane, B. (1989). Folylpolylglutamate Synthesis and Role in the Regulation of One-Carbon  
945 Metabolism. Vitamins & Hormones. G. D. Aurbach and D. B. McCormick, Academic Press. **45**:  
946 263-335. [https://doi.org/10.1016/S0083-6729\(08\)60397-0](https://doi.org/10.1016/S0083-6729(08)60397-0)
- 947 Sheik, A. R., C. P. Brussaard, G. Lavik, P. Lam, N. Musat, A. Krupke, S. Littmann, M. Strous  
948 and M. M. Kuypers (2014). "Responses of the coastal bacterial community to viral infection of  
949 the algae *Phaeocystis globosa*." ISME J **8**(1): 212-225. 10.1038/ismej.2013.135
- 950 Shibl, A. A., A. Isaac, M. A. Ochsenkühn, A. Cárdenas, C. Fei, G. Behringer, M. Arnoux, N.  
951 Drou, M. P. Santos, K. C. Gunsalus, C. R. Voelstra and S. A. Amin (2020). "Diatom modulation  
952 of select bacteria through use of two unique secondary metabolites." Proceedings of the  
953 National Academy of Sciences **117**(44): 27445-27455. doi:10.1073/pnas.2012088117
- 954 Sosa, O. A., J. R. Casey and D. M. Karl (2019). "Methylphosphonate Oxidation in  
955 *Prochlorococcus* Strain MIT9301 Supports Phosphate Acquisition, Formate  
956 Excretion, and Carbon Assimilation into Purines." Applied and Environmental Microbiology  
957 **85**(13): e00289-00219. 10.1128/aem.00289-19
- 958 Srivastava, A., D. E. M. Saavedra, B. Thomson, J. A. L. García, Z. Zhao, W. M. Patrick, G. J.  
959 Herndl and F. Baltar (2021). "Enzyme promiscuity in natural environments: alkaline  
960 phosphatase in the ocean." The ISME Journal **15**(11): 3375-3383. 10.1038/s41396-021-01013-  
961 w
- 962 Stein, L. (2001). "Genome annotation: from sequence to biology." Nature Reviews Genetics  
963 **2**(7): 493-503. 10.1038/35080529
- 964 Sterck, L., K. Billiau, T. Abeel, P. Rouzé and Y. Van de Peer (2012). "ORCAE: online resource  
965 for community annotation of eukaryotes." Nature Methods **9**(11): 1041-1041.  
966 10.1038/nmeth.2242
- 967 Sun, J., L. Steindler, J. C. Thrash, K. H. Halsey, D. P. Smith, A. E. Carter, Z. C. Landry and S. J.  
968 Giovannoni (2011). "One Carbon Metabolism in SAR11 Pelagic Marine Bacteria." PLOS ONE  
969 **6**(8): e23973. 10.1371/journal.pone.0023973
- 970 Tarazona-Janampa, U. I., A. D. Cembella, M. C. Pelayo-Zárate, S. Pajares, L. M. Márquez-  
971 Valdelamar, Y. B. Okolodkov, J. Tebben, B. Krock and L. M. Durán-Riveroll (2020). "Associated  
972 Bacteria and Their Effects on Growth and Toxicogenicity of the Dinoflagellate *Prorocentrum lima*  
973 Species Complex From Epibenthic Substrates Along Mexican Coasts." Frontiers in Marine  
974 Science **7**. 10.3389/fmars.2020.00569
- 975 Tinta, T., Z. Zhao, B. Bayer and G. J. Herndl (2023). "Jellyfish detritus supports niche  
976 partitioning and metabolic interactions among pelagic marine bacteria." Microbiome **11**(1): 156.  
977 10.1186/s40168-023-01598-8
- 978 Vries, G. E. d., N. Arfman, P. Terpstra and L. Dijkhuizen (1992). "Cloning, expression, and  
979 sequence analysis of the *Bacillus methanolicus* C1 methanol dehydrogenase gene." Journal of  
980 Bacteriology **174**(16): 5346-5353. doi:10.1128/jb.174.16.5346-5353.1992
- 981 Weissberg, O., D. Aharonovich and D. Sher (2023). "Phototroph-heterotroph interactions during  
982 growth and long-term starvation across *Prochlorococcus* and *Alteromonas* diversity." The ISME  
983 Journal **17**(2): 227-237. 10.1038/s41396-022-01330-8
- 984 Wietz, M., M. López-Pérez, D. Sher, S. J. Biller and F. Rodriguez-Valera (2022). "Microbe  
985 Profile: *Alteromonas macleodii* - a widespread, fast-responding, 'interactive' marine bacterium."  
986 Microbiology (Reading) **168**(11). 10.1099/mic.0.001236
- 987 Zhang, H., T. Yohe, L. Huang, S. Entwistle, P. Wu, Z. Yang, P. K. Busk, Y. Xu and Y. Yin  
988 (2018). "dbCAN2: a meta server for automated carbohydrate-active enzyme annotation."  
989 Nucleic Acids Res **46**(W1): W95-w101. 10.1093/nar/gky418

- 990 Zhao, Z., F. Baltar and G. J. Herndl (2020). "Linking extracellular enzymes to phylogeny  
991 indicates a predominantly particle-associated lifestyle of deep-sea prokaryotes." Science  
992 Advances **6**(16): eaaz4354. doi:10.1126/sciadv.aaz4354
- 993 Zoccarato, L., D. Sher, T. Miki, D. Segrè and H.-P. Grossart (2022). "A comparative whole-  
994 genome approach identifies bacterial traits for marine microbial interactions." Communications  
995 Biology **5**(1): 276. 10.1038/s42003-022-03184-4
- 996  
997
- 998 Alonso-Sáez, L., V. Balagué, E. L. Sà, O. Sánchez, J. M. González, J. Pinhassi, R. Massana, J.  
999 Pernthaler, C. Pedrós-Alió and J. M. Gasol (2007). "Seasonality in bacterial diversity in north-  
1000 west Mediterranean coastal waters: assessment through clone libraries, fingerprinting and  
1001 FISH." FEMS Microbiology Ecology **60**(1): 98-112. [https://doi.org/10.1111/j.1574-](https://doi.org/10.1111/j.1574-6941.2006.00276.x)  
1002 [6941.2006.00276.x](https://doi.org/10.1111/j.1574-6941.2006.00276.x)
- 1003 Altenhoff, A. M. and C. Dessimoz (2009). "Phylogenetic and Functional Assessment of  
1004 Orthologs Inference Projects and Methods." PLoS Computational Biology **5**(1): e1000262.  
1005 10.1371/journal.pcbi.1000262
- 1006 Anthony, C. (2011). "How half a century of research was required to understand bacterial  
1007 growth on C1 and C2 compounds; the story of the serine cycle and the ethylmalonyl-CoA  
1008 pathway." Sci Prog **94**(Pt 2): 109-137. 10.3184/003685011x13044430633960
- 1009 Antoine, E., J.-L. Rolland, J.-P. Raffin and J. Dietrich (1999). "Cloning and over-expression in  
1010 Escherichia coli of the gene encoding NADPH group III alcohol dehydrogenase from  
1011 Thermococcus hydrothermalis." European Journal of Biochemistry **264**(3): 880-889.  
1012 <https://doi.org/10.1046/j.1432-1327.1999.00685.x>
- 1013 Arkin, A. P., R. W. Cottingham, C. S. Henry, N. L. Harris, R. L. Stevens, S. Maslov, P. Dehal, D.  
1014 Ware, F. Perez, S. Canon, M. W. Sneddon, M. L. Henderson, W. J. Riehl, D. Murphy-Olson, S.  
1015 Y. Chan, R. T. Kamimura, S. Kumari, M. M. Drake, T. S. Brettin, E. M. Glass, D. Chivian, D.  
1016 Gunter, D. J. Weston, B. H. Allen, J. Baumohl, A. A. Best, B. Bowen, S. E. Brenner, C. C. Bun,  
1017 J.-M. Chandonia, J.-M. Chia, R. Colasanti, N. Conrad, J. J. Davis, B. H. Davison, M. DeJongh,  
1018 S. Devoid, E. Dietrich, I. Dubchak, J. N. Edirisinghe, G. Fang, J. P. Faria, P. M. Frybarger, W.  
1019 Gerlach, M. Gerstein, A. Greiner, J. Gurtowski, H. L. Haun, F. He, R. Jain, M. P. Joachimiak, K.  
1020 P. Keegan, S. Kondo, V. Kumar, M. L. Land, F. Meyer, M. Mills, P. S. Novichkov, T. Oh, G. J.  
1021 Olsen, R. Olson, B. Parrello, S. Pasternak, E. Pearson, S. S. Poon, G. A. Price, S.  
1022 Ramakrishnan, P. Ranjan, P. C. Ronald, M. C. Schatz, S. M. D. Seaver, M. Shukla, R. A.  
1023 Sutormin, M. H. Syed, J. Thomason, N. L. Tintle, D. Wang, F. Xia, H. Yoo, S. Yoo and D. Yu  
1024 (2018). "KBase: The United States Department of Energy Systems Biology Knowledgebase."  
1025 Nature Biotechnology **36**: 566. 10.1038/nbt.4163  
1026 <https://www.nature.com/articles/nbt.4163#supplementary-information>
- 1027 Aziz, R. K., D. Bartels, A. A. Best, M. DeJongh, T. Disz, R. A. Edwards, K. Formsma, S. Gerdes,  
1028 E. M. Glass, M. Kubal, F. Meyer, G. J. Olsen, R. Olson, A. L. Osterman, R. A. Overbeek, L. K.  
1029 McNeil, D. Paarmann, T. Paczian, B. Parrello, G. D. Pusch, C. Reich, R. Stevens, O. Vassieva,  
1030 V. Vonstein, A. Wilke and O. Zagnitko (2008). "The RAST Server: rapid annotations using  
1031 subsystems technology." BMC Genomics **9**: 75. 10.1186/1471-2164-9-75
- 1032 Baev, M. V., N. L. Schklyar, L. V. Chistoserdova, A. Y. Chistoserdov, B. M. Polanuer, Y. D.  
1033 Tsygankov and V. E. Sterkin (1992). "Growth of the obligate methylotroph *Methylobacillus*  
1034 *flagellatum* under stationary and nonstationary conditions during continuous cultivation."  
1035 Biotechnology and Bioengineering **39**(6): 688-695. <https://doi.org/10.1002/bit.260390614>
- 1036 Barber, R. D., M. A. Rott and T. J. Donohue (1996). "Characterization of a glutathione-  
1037 dependent formaldehyde dehydrogenase from *Rhodobacter sphaeroides*." Journal of  
1038 Bacteriology **178**(5): 1386-1393. doi:10.1128/jb.178.5.1386-1393.1996

- 1039 Baumann, L., P. Baumann, M. Mandel and R. D. Allen (1972). "Taxonomy of Aerobic Marine  
1040 Eubacteria." *Journal of Bacteriology* **110**(1): 402-429. doi:10.1128/jb.110.1.402-429.1972
- 1041 Baumann, P., L. Baumann, R. Bowditch and B. Beaman (1984). "Taxonomy of *Alteromonas*: *A.*  
1042 *nigrifaciens* sp. nov., nom. rev.; *A. macleodii*; and *A. Haloplanktis*." *International Journal of*  
1043 *Systematic and Evolutionary Microbiology* **34**. 10.1099/00207713-34-2-145
- 1044 Bernstein, D. B., S. Sulheim, E. Almaas and D. Segrè (2021). "Addressing uncertainty in  
1045 genome-scale metabolic model reconstruction and analysis." *Genome Biology* **22**(1): 64.  
1046 10.1186/s13059-021-02289-z
- 1047 Bertilsson, S., O. Berglund, M. J. Pullin and S. W. Chisholm (2005). "Release of dissolved  
1048 organic matter by *Prochlorococcus*." *Vie Et Milieu-Life and Environment* **55**(3-4): 225-231.
- 1049 Bianchi, D., T. S. Weber, R. Kiko and C. Deutsch (2018). "Global niche of marine anaerobic  
1050 metabolisms expanded by particle microenvironments." *Nature Geoscience* **11**(4): 263-268.  
1051 10.1038/s41561-018-0081-0
- 1052 Biller, S. J., A. Coe, A.-B. Martin-Cuadrado and S. W. Chisholm (2015). "Draft Genome  
1053 Sequence of *Alteromonas macleodii* Strain MIT1002, Isolated from an Enrichment Culture of the  
1054 Marine Cyanobacterium *Prochlorococcus*." *Genome Announcements* **3**(4):  
1055 10.1128/genomea.00967-00915. doi:10.1128/genomea.00967-15
- 1056 Braakman, R., M. J. Follows and S. W. Chisholm (2017). "Metabolic evolution and the self-  
1057 organization of ecosystems." *Proceedings of the National Academy of Sciences* **114**(15):  
1058 E3091-E3100. 10.1073/pnas.1619573114
- 1059 Buels, R., E. Yao, C. M. Diesh, R. D. Hayes, M. Munoz-Torres, G. Helt, D. M. Goodstein, C. G.  
1060 Elsik, S. E. Lewis, L. Stein and I. H. Holmes (2016). "JBrowse: a dynamic web platform for  
1061 genome visualization and analysis." *Genome Biology* **17**(1): 66. 10.1186/s13059-016-0924-1
- 1062 Burley, S. K., C. Bhikadiya, C. Bi, S. Bittrich, L. Chen, G. V. Crichlow, C. H. Christie, K.  
1063 Dalenberg, L. Di Costanzo, J. M. Duarte, S. Dutta, Z. Feng, S. Ganesan, D. S. Goodsell, S.  
1064 Ghosh, R. K. Green, V. Guranović, D. Guzenko, B. P. Hudson, C. L. Lawson, Y. Liang, R. Lowe,  
1065 H. Namkoong, E. Peisach, I. Persikova, C. Randle, A. Rose, Y. Rose, A. Sali, J. Segura, M.  
1066 Sekharan, C. Shao, Y. P. Tao, M. Voigt, J. D. Westbrook, J. Y. Young, C. Zardecki and M.  
1067 Zhuravleva (2021). "RCSB Protein Data Bank: powerful new tools for exploring 3D structures of  
1068 biological macromolecules for basic and applied research and education in fundamental biology,  
1069 biomedicine, biotechnology, bioengineering and energy sciences." *Nucleic Acids Res* **49**(D1):  
1070 D437-d451. 10.1093/nar/gkaa1038
- 1071 Cao, J.-Y., Y.-Y. Wang, M.-N. Wu, Z.-Y. Kong, J.-H. Lin, T. Ling, S.-M. Xu, S.-N. Ma, L. Zhang,  
1072 C.-X. Zhou, X.-J. Yan and J.-L. Xu (2021). "RNA-seq Insights Into the Impact of *Alteromonas*  
1073 *macleodii* on *Isochrysis galbana*." *Frontiers in Microbiology* **12**. 10.3389/fmicb.2021.711998
- 1074 Caspi, R., R. Billington, I. M. Keseler, A. Kothari, M. Krummenacker, P. E. Midford, W. K. Ong,  
1075 S. Paley, P. Subhraveti and P. D. Karp (2020). "The MetaCyc database of metabolic pathways  
1076 and enzymes - a 2019 update." *Nucleic Acids Res* **48**(D1): D445-d453. 10.1093/nar/gkz862
- 1077 Cecchini, G., I. Schröder, R. P. Gunsalus and E. Maklashina (2002). "Succinate dehydrogenase  
1078 and fumarate reductase from *Escherichia coli*." *Biochimica et Biophysica Acta (BBA) -*  
1079 *Bioenergetics* **1553**(1): 140-157. [https://doi.org/10.1016/S0005-2728\(01\)00238-9](https://doi.org/10.1016/S0005-2728(01)00238-9)
- 1080 Concórdio-Reis, P., V. D. Alves, X. Moppert, J. Guézennec, F. Freitas and M. A. M. Reis (2021).  
1081 "Characterization and Biotechnological Potential of Extracellular Polysaccharides Synthesized  
1082 by *Alteromonas* Strains Isolated from French Polynesia Marine Environments." *Marine Drugs*  
1083 **19**(9): 522.
- 1084 Datta, M. S., A. A. Almada, M. F. Baumgartner, T. J. Mincer, A. M. Tarrant and M. F. Polz  
1085 (2018). "Inter-individual variability in copepod microbiomes reveals bacterial networks linked to  
1086 host physiology." *The ISME Journal* **12**(9): 2103-2113. 10.1038/s41396-018-0182-1
- 1087 Diner, R. E., S. M. Schwenck, J. P. McCrow, H. Zheng and A. E. Allen (2016). "Genetic  
1088 Manipulation of Competition for Nitrate between Heterotrophic Bacteria and Diatoms." *Frontiers*  
1089 *in Microbiology* **7**(880). 10.3389/fmicb.2016.00880

- 1090 Dixon, J. L., S. Sargeant, P. D. Nightingale and J. Colin Murrell (2013). "Gradients in microbial  
1091 methanol uptake: productive coastal upwelling waters to oligotrophic gyres in the Atlantic  
1092 Ocean." *The ISME Journal* **7**(3): 568-580. 10.1038/ismej.2012.130
- 1093 Drula, E., M. L. Garron, S. Dogan, V. Lombard, B. Henrissat and N. Terrapon (2022). "The  
1094 carbohydrate-active enzyme database: functions and literature." **50**(D1): D571-d577.  
1095 10.1093/nar/gkab1045
- 1096 Dunn, N. A., D. R. Unni, C. Diesh, M. Munoz-Torres, N. L. Harris, E. Yao, H. Rasche, I. H.  
1097 Holmes, C. G. Elsik and S. E. Lewis (2019). "Apollo: Democratizing genome annotation." *PLOS*  
1098 *Computational Biology* **15**(2): e1006790. 10.1371/journal.pcbi.1006790
- 1099 Edgar, R. C. (2004). "MUSCLE: multiple sequence alignment with high accuracy and high  
1100 throughput." *Nucleic Acids Research* **32**(5): 1792-1797. 10.1093/nar/gkh340
- 1101 Elsik, C. G., K. C. Worley, L. Zhang, N. V. Milshina, H. Jiang, J. T. Reese, K. L. Childs, A.  
1102 Venkatraman, C. M. Dickens, G. M. Weinstock and R. A. Gibbs (2006). "Community annotation:  
1103 Procedures, protocols, and supporting tools." *Genome Research* **16**(11): 1329-1333.  
1104 10.1101/gr.5580606
- 1105 Fadeev, E., F. De Pascale, A. Vezzi, S. Hübner, D. Aharonovich and D. Sher (2016). "Why  
1106 close a bacterial genome? The plasmid of *Alteromonas macleodii* HOT1A3 is a vector for inter-  
1107 specific transfer of a flexible genomic island." *Frontiers in Microbiology* **7**.  
1108 10.3389/fmicb.2016.00248
- 1109 Fang, X., C. J. Lloyd and B. O. Palsson (2020). "Reconstructing organisms in silico: genome-  
1110 scale models and their emerging applications." *Nature Reviews Microbiology* **18**(12): 731-743.  
1111 10.1038/s41579-020-00440-4
- 1112 Finkel, Z. V., M. J. Follows, J. D. Liefer, C. M. Brown, I. Benner and A. J. Irwin (2016).  
1113 "Phylogenetic Diversity in the Macromolecular Composition of Microalgae." *PLOS ONE* **11**(5):  
1114 e0155977. 10.1371/journal.pone.0155977
- 1115 Forchielli, E., D. Sher and D. Segrè (2022). "Metabolic Phenotyping of Marine Heterotrophs on  
1116 Refactored Media Reveals Diverse Metabolic Adaptations and Lifestyle Strategies." *mSystems*  
1117 **0**(0): e00070-00022. doi:10.1128/msystems.00070-22
- 1118 Fritts, R. K., A. L. McCully and J. B. McKinlay (2021). "Extracellular Metabolism Sets the Table  
1119 for Microbial Cross-Feeding." *Microbiology and Molecular Biology Reviews* **85**(1):  
1120 10.1128/mubr.00135-00120. doi:10.1128/mubr.00135-20
- 1121 Geider, R. J. and J. La Roche (2002). "Redfield revisited: variability of C : N : P in marine  
1122 microalgae and its biochemical basis." *European Journal of Phycology* **37**(1): 1-17. Doi  
1123 10.1017/S0967026201003456
- 1124 Gerlach, N. (2017). *Biochemical and structural analysis of marine polysaccharide lyases*. MSc,  
1125 Universität Bremen.
- 1126 Ghatak, S., Z. A. King, A. Sastry and B. O. Palsson (2019). "The y-ome defines the 35% of  
1127 *Escherichia coli* genes that lack experimental evidence of function." *Nucleic Acids Res* **47**(5):  
1128 2446-2454. 10.1093/nar/gkz030
- 1129 Givati, S., X. Yang, D. Sher and E. Rahav (2023). "Testing the growth rate and  
1130 translation compensation hypotheses in marine bacterioplankton." *Environmental Microbiology*  
1131 **n/a**(n/a). <https://doi.org/10.1111/1462-2920.16346>
- 1132 Gonzaga, A., A.-B. Martin-Cuadrado, M. López-Pérez, C. Megumi Mizuno, I. García-Heredia, N.  
1133 E. Kimes, P. Lopez-García, D. Moreira, D. Ussery, M. Zaballos, R. Ghai and F. Rodriguez-  
1134 Valera (2012). "Polyclonality of Concurrent Natural Populations of *Alteromonas macleodii*."  
1135 *Genome Biology and Evolution* **4**(12): 1360-1374. 10.1093/gbe/evs112
- 1136 Green, M. L. and P. D. Karp (2004). "A Bayesian method for identifying missing enzymes in  
1137 predicted metabolic pathway databases." *BMC Bioinformatics* **5**: 76. 10.1186/1471-2105-5-76
- 1138 Harms, N., J. Ras, W. N. Reijnders, R. J. v. Spanning and A. H. Stouthamer (1996). "S-  
1139 formylglutathione hydrolase of *Paracoccus denitrificans* is homologous to human esterase D: a

1140 universal pathway for formaldehyde detoxification?" Journal of Bacteriology **178**(21): 6296-  
1141 6299. doi:10.1128/jb.178.21.6296-6299.1996  
1142 Helland, S., B. F. Terjesen and L. Berg (2003). "Free amino acid and protein content in the  
1143 planktonic copepod *Temora longicornis* compared to *Artemia franciscana*." Aquaculture **215**(1):  
1144 213-228. [https://doi.org/10.1016/S0044-8486\(02\)00043-1](https://doi.org/10.1016/S0044-8486(02)00043-1)  
1145 Hennon, G. M. M., J. J. Morris, S. T. Haley, E. R. Zinser, A. R. Durrant, E. Entwistle, T. Dokland  
1146 and S. T. Dyhrman (2017). "The impact of elevated CO<sub>2</sub> on *Prochlorococcus* and microbial  
1147 interactions with 'helper' bacterium *Alteromonas*." The ISME Journal **12**: 520.  
1148 10.1038/ismej.2017.189  
1149 <https://www.nature.com/articles/ismej2017189#supplementary-information>  
1150 Henríquez-Castillo, C., A. M. Plominsky, S. Ramírez-Flandes, A. D. Bertagnolli, F. J. Stewart  
1151 and O. Ulloa (2022). "Metaomics unveils the contribution of *Alteromonas* bacteria to carbon  
1152 cycling in marine oxygen minimum zones." Frontiers in Marine Science **9**.  
1153 10.3389/fmars.2022.993667  
1154 Herrero, A. and E. Flores (1997). Nitrate metabolism. Cyanobacterial nitrogen metabolism and  
1155 environmental biotechnology. New Delhi, India, Narosa Publishing House: 1-33.  
1156 Heyer, H. and W. E. Krumbein (1991). "Excretion of fermentation products in dark and  
1157 anaerobically incubated cyanobacteria." Archives of Microbiology **155**(3): 284-287.  
1158 10.1007/BF00252213  
1159 Hobbs, J. K., S. M. Lee, M. Robb, F. Hof, C. Barr, K. T. Abe, J.-H. Hehemann, R. McLean, D.  
1160 W. Abbott and A. B. Boraston (2016). "KdgF, the missing link in the microbial metabolism of  
1161 uronate sugars from pectin and alginate." Proceedings of the National Academy of Sciences  
1162 **113**(22): 6188-6193. doi:10.1073/pnas.1524214113  
1163 Hosmani, P. S., T. Shippy, S. Miller, J. B. Benoit, M. Munoz-Torres, M. Flores-Gonzalez, L. A.  
1164 Mueller, H. Wiersma-Koch, T. D'Elia, S. J. Brown and S. Saha (2019). "A quick guide for  
1165 student-driven community genome annotation." PLOS Computational Biology **15**(4): e1006682.  
1166 10.1371/journal.pcbi.1006682  
1167 Hou, S., M. López-Pérez, U. Pfreundt, N. Belkin, K. Stüber, B. Huettel, R. Reinhardt, I. Berman-  
1168 Frank, F. Rodriguez-Valera and W. R. Hess (2018). "Benefit from decline: the primary  
1169 transcriptome of *Alteromonas macleodii* str. Te101 during *Trichodesmium* demise." The ISME  
1170 Journal **12**(4): 981-996. 10.1038/s41396-017-0034-4  
1171 Huang, L., Y. Zhang, X. Du, R. An and X. Liang (2022). "Escherichia coli Can Eat DNA as an  
1172 Excellent Nitrogen Source to Grow Quickly." Frontiers in Microbiology **13**.  
1173 10.3389/fmicb.2022.894849  
1174 Ivars-Martinez, E., A.-B. Martin-Cuadrado, G. D'Auria, A. Mira, S. Ferriera, J. Johnson, R.  
1175 Friedman and F. Rodriguez-Valera (2008). "Comparative genomics of two ecotypes of the  
1176 marine planktonic copiotroph *Alteromonas macleodii* suggests alternative lifestyles associated  
1177 with different kinds of particulate organic matter." Isme J **2**(12): 1194-1212.  
1178 Jung, H., T. Ventura, J. S. Chung, W.-J. Kim, B.-H. Nam, H. J. Kong, Y.-O. Kim, M.-S. Jeon and  
1179 S.-i. Eyun (2020). "Twelve quick steps for genome assembly and annotation in the classroom."  
1180 PLOS Computational Biology **16**(11): e1008325. 10.1371/journal.pcbi.1008325  
1181 Kallen, R. G. and W. P. Jencks (1966). "The Mechanism of the Condensation of Formaldehyde  
1182 with Tetrahydrofolic Acid." Journal of Biological Chemistry **241**(24): 5851-5863. 10.1016/S0021-  
1183 9258(18)96350-7  
1184 Kanehisa, M. and S. Goto (2000). "KEGG: Kyoto Encyclopedia of Genes and Genomes."  
1185 Nucleic Acids Research **28**(1): 27-30. 10.1093/nar/28.1.27  
1186 Karlsen, E., C. Schulz and E. Almaas (2018). "Automated generation of genome-scale  
1187 metabolic draft reconstructions based on KEGG." BMC Bioinformatics **19**(1): 467.  
1188 10.1186/s12859-018-2472-z  
1189 Karp, P. D., R. Billington, R. Caspi, C. A. Fulcher, M. Latendresse, A. Kothari, I. M. Keseler, M.  
1190 Krummenacker, P. E. Midford, Q. Ong, W. K. Ong, S. M. Paley and P. Subhraveti (2019). "The

- 1191 BioCyc collection of microbial genomes and metabolic pathways." *Brief Bioinform* **20**(4): 1085-  
1192 1093. [10.1093/bib/bbx085](https://doi.org/10.1093/bib/bbx085)
- 1193 Karp, P. D., P. E. Midford, R. Billington, A. Kothari, M. Krummenacker, M. Latendresse, W. K.  
1194 Ong, P. Subhraveti, R. Caspi, C. Fulcher, I. M. Keseler and S. M. Paley (2021). "Pathway Tools  
1195 version 23.0 update: software for pathway/genome informatics and systems biology." *Brief*  
1196 *Bioinform* **22**(1): 109-126. [10.1093/bib/bbz104](https://doi.org/10.1093/bib/bbz104)
- 1197 Karp, P. D., S. Paley, R. Caspi, A. Kothari, M. Krummenacker, P. E. Midford, L. R. Moore, P.  
1198 Subhraveti, S. Gama-Castro, V. H. Tierrafria, P. Lara, L. Muñoz-Rascado, C. Bonavides-  
1199 Martinez, A. Santos-Zavaleta, A. Mackie, G. Sun, T. A. Ahn-Horst, H. Choi, M. W. Covert, J.  
1200 Collado-Vides and I. Paulsen (2023). "The EcoCyc Database (2023)." *EcoSal Plus* **0**(0): eesp-  
1201 0002-2023. doi:10.1128/ecosalplus.esp-0002-2023
- 1202 Katoh, K. and D. M. Standley (2013). "MAFFT Multiple Sequence Alignment Software Version 7:  
1203 Improvements in Performance and Usability." *Molecular Biology and Evolution* **30**(4): 772-780.  
1204 [10.1093/molbev/mst010](https://doi.org/10.1093/molbev/mst010)
- 1205 Kazakov, A. E., D. A. Rodionov, E. Alm, A. P. Arkin, I. Dubchak and M. S. Gelfand (2009).  
1206 "Comparative Genomics of Regulation of Fatty Acid and Branched-Chain Amino Acid Utilization  
1207 in Proteobacteria." *Journal of Bacteriology* **191**(1): 52-64. doi:10.1128/jb.01175-08
- 1208 Kearney, S. M., E. Thomas, A. Coe and S. W. Chisholm (2021). "Microbial diversity of co-  
1209 occurring heterotrophs in cultures of marine picocyanobacteria." *Environmental Microbiome*  
1210 **16**(1): 1. [10.1186/s40793-020-00370-x](https://doi.org/10.1186/s40793-020-00370-x)
- 1211 Keltjens, J. T., A. Pol, J. Reimann and H. J. Op den Camp (2014). "PQQ-dependent methanol  
1212 dehydrogenases: rare-earth elements make a difference." *Appl Microbiol Biotechnol* **98**(14):  
1213 6163-6183. [10.1007/s00253-014-5766-8](https://doi.org/10.1007/s00253-014-5766-8)
- 1214 Koch, H., A. Dürwald, T. Schweder, B. Noriega-Ortega, S. Vidal-Melgosa, J.-H. Hehemann, T.  
1215 Dittmar, H. M. Freese, D. Becher, M. Simon and M. Wietz (2019). "Biphasic cellular adaptations  
1216 and ecological implications of *Alteromonas macleodii* degrading a mixture of algal  
1217 polysaccharides." *The ISME Journal* **13**(1): 92-103. [10.1038/s41396-018-0252-4](https://doi.org/10.1038/s41396-018-0252-4)
- 1218 Koch, H., N. Germscheid, H. M. Freese, B. Noriega-Ortega, D. Lücking, M. Berger, G. Qiu, E.  
1219 M. Marzinelli, A. H. Campbell, P. D. Steinberg, J. Overmann, T. Dittmar, M. Simon and M. Wietz  
1220 (2020). "Genomic, metabolic and phenotypic variability shapes ecological differentiation and  
1221 intraspecies interactions of *Alteromonas macleodii*." *Scientific Reports* **10**(1): 809.  
1222 [10.1038/s41598-020-57526-5](https://doi.org/10.1038/s41598-020-57526-5)
- 1223 Larsson, A. (2014). "AliView: a fast and lightweight alignment viewer and editor for large  
1224 datasets." *Bioinformatics* **30**(22): 3276-3278. [10.1093/bioinformatics/btu531](https://doi.org/10.1093/bioinformatics/btu531)
- 1225 Lee, C., S. G. Wakeham and J. I. Hedges (2000). "Composition and flux of particulate amino  
1226 acids and chloropigments in equatorial Pacific seawater and sediments." *Deep Sea Research*  
1227 *Part I: Oceanographic Research Papers* **47**(8): 1535-1568. [https://doi.org/10.1016/S0967-  
1228 0637\(99\)00116-8](https://doi.org/10.1016/S0967-0637(99)00116-8)
- 1229 Lee, M. D., N. G. Walworth, E. L. McParland, F.-X. Fu, T. J. Mincer, N. M. Levine, D. A.  
1230 Hutchins and E. A. Webb (2017). "The *Trichodesmium* consortium: conserved heterotrophic co-  
1231 occurrence and genomic signatures of potential interactions." *The ISME Journal* **11**(8): 1813-  
1232 1824. [10.1038/ismej.2017.49](https://doi.org/10.1038/ismej.2017.49)
- 1233 Lee, T. J., I. Paulsen and P. Karp (2008). "Annotation-based inference of transporter function."  
1234 *Bioinformatics* **24**(13): i259-267. [10.1093/bioinformatics/btn180](https://doi.org/10.1093/bioinformatics/btn180)
- 1235 Li, W., K. R. O'Neill, D. H. Haft, M. DiCuccio, V. Chetvernin, A. Badretdin, G. Coulouris, F.  
1236 Chitsaz, Myra K. Derbyshire, A. S. Durkin, N. R. Gonzales, M. Gwadz, Christopher J. Lanczycki,  
1237 J. S. Song, N. Thanki, J. Wang, Roxanne A. Yamashita, M. Yang, C. Zheng, A. Marchler-Bauer  
1238 and F. Thibaud-Nissen (2020). "RefSeq: expanding the Prokaryotic Genome Annotation  
1239 Pipeline reach with protein family model curation." *Nucleic Acids Research* **49**(D1): D1020-  
1240 D1028. [10.1093/nar/gkaa1105](https://doi.org/10.1093/nar/gkaa1105)



- 1241 Lidbury, I., J. C. Murrell and Y. Chen (2014). "Trimethylamine *N*-oxide metabolism by  
1242 abundant marine heterotrophic bacteria." Proceedings of the National Academy of Sciences  
1243 **111**(7): 2710-2715. doi:10.1073/pnas.1317834111
- 1244 Lin, J. T. and V. Stewart (1997). Nitrate Assimilation by Bacteria. Advances in Microbial  
1245 Physiology. R. K. Poole, Academic Press. **39**: 1-30. [https://doi.org/10.1016/S0065-](https://doi.org/10.1016/S0065-2911(08)60014-4)  
1246 [2911\(08\)60014-4](https://doi.org/10.1016/S0065-2911(08)60014-4)
- 1247 Liu, X., Y. Dong, J. Zhang, A. Zhang, L. Wang and L. Feng (2009). "Two novel metal-  
1248 independent long-chain alkyl alcohol dehydrogenases from *Geobacillus thermodenitrificans*  
1249 NG80-2." Microbiology **155**(6): 2078-2085. <https://doi.org/10.1099/mic.0.027201-0>
- 1250 Liu, Y., L. Sargent, W. Leung, S. C. R. Elgin and J. Goecks (2019). "G-OnRamp: a Galaxy-  
1251 based platform for collaborative annotation of eukaryotic genomes." Bioinformatics **35**(21):  
1252 4422-4423. 10.1093/bioinformatics/btz309
- 1253 Lopez-Perez, M., A. Gonzaga, A. B. Martin-Cuadrado, O. Onyshchenko, A. Ghavidel, R. Ghai  
1254 and F. Rodriguez-Valera (2012). "Genomes of surface isolates of *Alteromonas macleodii*: the  
1255 life of a widespread marine opportunistic copiotroph." Sci Rep **2**: 696. 10.1038/srep00696
- 1256 López-Pérez, M., N. Ramon-Marco and F. Rodriguez-Valera (2017). "Networking in microbes:  
1257 conjugative elements and plasmids in the genus *Alteromonas*." BMC Genomics **18**(1): 36.  
1258 10.1186/s12864-016-3461-0
- 1259 López-Pérez, M. and F. Rodriguez-Valera (2016). "Pangenome evolution in the marine  
1260 bacterium *Alteromonas*." Genome Biology and Evolution. 10.1093/gbe/evw098
- 1261 Maia, L. B., L. Fonseca, I. Moura and J. J. G. Moura (2016). "Reduction of Carbon Dioxide by a  
1262 Molybdenum-Containing Formate Dehydrogenase: A Kinetic and Mechanistic Study." Journal of  
1263 the American Chemical Society **138**(28): 8834-8846. 10.1021/jacs.6b03941
- 1264 Manck, L. E., J. Park, B. J. Tully, A. M. Poire, R. M. Bundy, C. L. Dupont and K. A. Barbeau  
1265 (2022). "Petrobactin, a siderophore produced by *Alteromonas*, mediates community iron  
1266 acquisition in the global ocean." The ISME Journal **16**(2): 358-369. 10.1038/s41396-021-01065-  
1267 y
- 1268 Markowitz, V. M., K. Mavromatis, N. N. Ivanova, I. M. Chen, K. Chu and N. C. Kyrpides (2009).  
1269 "IMG ER: a system for microbial genome annotation expert review and curation." Bioinformatics  
1270 **25**(17): 2271-2278. btp393 [pii]  
1271 10.1093/bioinformatics/btp393
- 1272 Marx, C. J., L. Chistoserdova and M. E. Lidstrom (2003a). "Formaldehyde-Detoxifying Role of  
1273 the Tetrahydromethanopterin-Linked Pathway in *Methylobacterium extorquens* AM1."  
1274 Journal of Bacteriology **185**(24): 7160-7168. doi:10.1128/jb.185.23.7160-7168.2003
- 1275 Marx, C. J., M. Laukel, J. A. Vorholt and M. E. Lidstrom (2003b). "Purification of the Formate-  
1276 Tetrahydrofolate Ligase from *Methylobacterium extorquens* AM1 and Demonstration of Its  
1277 Requirement for Methylo-trophic Growth." Journal of Bacteriology **185**(24): 7169-7175.  
1278 doi:10.1128/jb.185.24.7169-7175.2003
- 1279 McCarren, J., J. W. Becker, D. J. Repeta, Y. Shi, C. R. Young, R. R. Malmstrom, S. W.  
1280 Chisholm and E. F. DeLong (2010). "Microbial community transcriptomes reveal microbes and  
1281 metabolic pathways associated with dissolved organic matter turnover in the sea." Proc Natl  
1282 Acad Sci U S A **107**(38): 16420–16427.
- 1283 Mehta, A., C. Sidhu, A. K. Pinnaka and A. Roy Choudhury (2014). "Extracellular polysaccharide  
1284 production by a novel osmotolerant marine strain of *Alteromonas macleodii* and its application  
1285 towards biomineralization of silver." PLoS One **9**(6): e98798. 10.1371/journal.pone.0098798
- 1286 Mestre, M., E. Borrull, M. M. Sala and J. M. Gasol (2017). "Patterns of bacterial diversity in the  
1287 marine planktonic particulate matter continuum." The ISME Journal **11**(4): 999-1010.  
1288 10.1038/ismej.2016.166
- 1289 Métris, A., P. Sudhakar, D. Fazekas, A. Demeter, E. Ari, M. Olbei, P. Branchu, R. A. Kingsley, J.  
1290 Baranyi and T. Korcsmáros (2017). "SalmoNet, an integrated network of ten *Salmonella*

- 1291 enterica strains reveals common and distinct pathways to host adaptation." *npj Systems Biology*  
1292 *and Applications* **3**(1): 31. 10.1038/s41540-017-0034-z
- 1293 Mincer, T. J. and A. C. Aicher (2016). "Methanol Production by a Broad Phylogenetic Array of  
1294 Marine Phytoplankton." *PLOS ONE* **11**(3): e0150820. 10.1371/journal.pone.0150820
- 1295 Mitulla, M., J. Dinasquet, R. Guillemette, M. Simon, F. Azam and M. Wietz (2016). "Response of  
1296 bacterial communities from California coastal waters to alginate particles and an alginolytic  
1297 *Alteromonas macleodii* strain." *Environmental Microbiology* **18**(12): 4369-4377.  
1298 <https://doi.org/10.1111/1462-2920.13314>
- 1299 Moisander, P. H., K. M. Shoemaker, M. C. Daley, E. McCliment, J. Larkum and M. A. Altabet  
1300 (2018). "Copepod-Associated Gammaproteobacteria Breathe Nitrate in the Open Ocean  
1301 Surface Layers." *Frontiers in Microbiology* **9**. 10.3389/fmicb.2018.02390
- 1302 Morris, J. J., R. Kirkegaard, M. J. Szul, Z. I. Johnson and E. R. Zinser (2008). "Facilitation of  
1303 robust growth of *Prochlorococcus* colonies and dilute liquid cultures by "helper" heterotrophic  
1304 bacteria." *Appl Environ Microbiol* **74**(14): 4530-4534.
- 1305 Mueller, L. A., P. Zhang and S. Y. Rhee (2003). "AraCyc: a biochemical pathway database for  
1306 *Arabidopsis*." *Plant Physiol* **132**(2): 453-460. 10.1104/pp.102.017236
- 1307 Müller, J. E. N., F. Meyer, B. Litsanov, P. Kiefer and J. A. Vorholt (2015). "Core pathways  
1308 operating during methylophony of *Bacillus methanolicus* MGA3 and induction of a bacillithiol-  
1309 dependent detoxification pathway upon formaldehyde stress." *Molecular Microbiology* **98**(6):  
1310 1089-1100. <https://doi.org/10.1111/mmi.13200>
- 1311 Neumann, A. M., J. P. Balmonte, M. Berger, H.-A. Giebel, C. Arnosti, S. Voget, M. Simon, T.  
1312 Brinkhoff and M. Wietz (2015). "Different utilization of alginate and other algal polysaccharides  
1313 by marine *Alteromonas macleodii* ecotypes." *Environmental Microbiology* **17**(10): 3857-3868.  
1314 <https://doi.org/10.1111/1462-2920.12862>
- 1315 Nguyen, L.-T., H. A. Schmidt, A. von Haeseler and B. Q. Minh (2014). "IQ-TREE: A Fast and  
1316 Effective Stochastic Algorithm for Estimating Maximum-Likelihood Phylogenies." *Molecular*  
1317 *Biology and Evolution* **32**(1): 268-274. 10.1093/molbev/msu300
- 1318 Paley, S., P. E. O'Maille, D. Weaver and P. D. Karp (2016). "Pathway collages: personalized  
1319 multi-pathway diagrams." *BMC Bioinformatics* **17**(1): 529. 10.1186/s12859-016-1382-1
- 1320 Pedler, B. E., L. I. Aluwihare and F. Azam (2014). "Single bacterial strain capable of significant  
1321 contribution to carbon cycling in the surface ocean." *Proceedings of the National Academy of*  
1322 *Sciences* **111**(20): 7202-7207. 10.1073/pnas.1401887111
- 1323 Pedreira, T., C. Eifmann and J. Stülke (2021). "The current state of SubtiWiki, the database for  
1324 the model organism *Bacillus subtilis*." *Nucleic Acids Research* **50**(D1): D875-D882.  
1325 10.1093/nar/gkab943
- 1326 Raguénès, G., M. A. Cambon-Bonavita, J. F. Lohier, C. Boisset and J. Guezennec (2003). "A  
1327 Novel, Highly Viscous Polysaccharide Excreted by an *Alteromonas* Isolated from a Deep-Sea  
1328 Hydrothermal Vent Shrimp." *Current Microbiology* **46**(6): 0448-0452. 10.1007/s00284-002-3922-  
1329 3
- 1330 Ramsey, J., B. McIntosh, D. Renfro, S. A. Aleksander, S. LaBonte, C. Ross, A. E. Zweifel, N.  
1331 Liles, S. Farrar, J. J. Gill, I. Erill, S. Ades, T. Z. Berardini, J. A. Bennett, S. Brady, R. Britton, S.  
1332 Carbon, S. M. Caruso, D. Clements, R. Dalia, M. Defelice, E. L. Doyle, I. Friedberg, S. M. R.  
1333 Gurney, L. Hughes, A. Johnson, J. M. Kowalski, D. Li, R. C. Lovering, T. L. Mans, F. McCarthy,  
1334 S. D. Moore, R. Murphy, T. D. Paustian, S. Perdue, C. N. Peterson, B. M. Prüß, M. S. Saha, R.  
1335 R. Sheehy, J. T. Tansey, L. Temple, A. W. Thorman, S. Trevino, A. C. Vollmer, V. Walbot, J.  
1336 Willey, D. A. Siegele and J. C. Hu (2021). "Crowdsourcing biocuration: The Community  
1337 Assessment of Community Annotation with Ontologies (CACAO)." *PLOS Computational Biology*  
1338 **17**(10): e1009463. 10.1371/journal.pcbi.1009463
- 1339 Ro, Y. T., H. I. Lee, E. J. Kim, J. H. Koo, E. Kim and Y. M. Kim (2003). "Purification,  
1340 characterization, and physiological response of a catalase-peroxidase in *Mycobacterium* sp.

1341 strain JC1 DSM 3803 grown on methanol." *FEMS Microbiology Letters* **226**(2): 397-403.  
1342 10.1016/s0378-1097(03)00644-x  
1343 Romero, P., J. Wagg, M. L. Green, D. Kaiser, M. Krummenacker and P. D. Karp (2005).  
1344 "Computational prediction of human metabolic pathways from the complete human genome."  
1345 *Genome Biol* **6**(1): R2. 10.1186/gb-2004-6-1-r2  
1346 Roth Rosenberg, D., M. Haber, J. Goldford, M. Lalzar, D. Aharonovich, A. Al-Ashhab, Y.  
1347 Lehahn, D. Segrè, L. Steindler and D. Sher (2021). "Particle-associated and free-living bacterial  
1348 communities in an oligotrophic sea are affected by different environmental factors."  
1349 *Environmental Microbiology* **n/a**(n/a). <https://doi.org/10.1111/1462-2920.15611>  
1350 Schulz-Mirbach, H., A. Müller, T. Wu, P. Pfister, S. Aslan, L. Schada von Borzyskowski, T. J.  
1351 Erb, A. Bar-Even and S. N. Lindner (2022). "On the flexibility of the cellular amination network in  
1352 *E coli*." *eLife* **11**: e77492. 10.7554/eLife.77492  
1353 Seaver, S. M. D., F. Liu, Q. Zhang, J. Jeffries, J. P. Faria, J. N. Edirisinghe, M. Mundy, N. Chia,  
1354 E. Noor, M. E. Beber, A. A. Best, M. DeJongh, J. A. Kimbrel, P. D'Haeseleer, S. R. McCorkle, J.  
1355 R. Bolton, E. Pearson, S. Canon, E. M. Wood-Charlson, R. W. Cottingham, A. P. Arkin and C.  
1356 S. Henry (2021). "The ModelSEED Biochemistry Database for the integration of metabolic  
1357 annotations and the reconstruction, comparison and analysis of metabolic models for plants,  
1358 fungi and microbes." *Nucleic Acids Res* **49**(D1): D575-d588. 10.1093/nar/gkaa746  
1359 Seemann, T. (2014). "Prokka: rapid prokaryotic genome annotation." *Bioinformatics* **30**(14):  
1360 2068-2069. 10.1093/bioinformatics/btu153  
1361 Shane, B. (1989). Folylpolyglutamate Synthesis and Role in the Regulation of One-Carbon  
1362 Metabolism. *Vitamins & Hormones*. G. D. Aurbach and D. B. McCormick, Academic Press. **45**:  
1363 263-335. [https://doi.org/10.1016/S0083-6729\(08\)60397-0](https://doi.org/10.1016/S0083-6729(08)60397-0)  
1364 Shibl, A. A., A. Isaac, M. A. Ochsenkühn, A. Cárdenas, C. Fei, G. Behringer, M. Arnoux, N.  
1365 Drou, M. P. Santos, K. C. Gunsalus, C. R. Voolstra and S. A. Amin (2020). "Diatom modulation  
1366 of select bacteria through use of two unique secondary metabolites." *Proceedings of the*  
1367 *National Academy of Sciences* **117**(44): 27445-27455. doi:10.1073/pnas.2012088117  
1368 Sosa, O. A., J. R. Casey and D. M. Karl (2019). "Methylphosphonate Oxidation in  
1369 *Prochlorococcus* Strain MIT9301 Supports Phosphate Acquisition, Formate  
1370 Excretion, and Carbon Assimilation into Purines." *Applied and Environmental Microbiology*  
1371 **85**(13): e00289-00219. 10.1128/aem.00289-19  
1372 Srivastava, A., D. E. M. Saavedra, B. Thomson, J. A. L. García, Z. Zhao, W. M. Patrick, G. J.  
1373 Herndl and F. Baltar (2021). "Enzyme promiscuity in natural environments: alkaline  
1374 phosphatase in the ocean." *The ISME Journal* **15**(11): 3375-3383. 10.1038/s41396-021-01013-  
1375 w  
1376 Stein, L. (2001). "Genome annotation: from sequence to biology." *Nature Reviews Genetics*  
1377 **2**(7): 493-503. 10.1038/35080529  
1378 Sterck, L., K. Billiau, T. Abeel, P. Rouzé and Y. Van de Peer (2012). "ORCAE: online resource  
1379 for community annotation of eukaryotes." *Nature Methods* **9**(11): 1041-1041.  
1380 10.1038/nmeth.2242  
1381 Sun, J., L. Steindler, J. C. Thrash, K. H. Halsey, D. P. Smith, A. E. Carter, Z. C. Landry and S. J.  
1382 Giovannoni (2011). "One Carbon Metabolism in SAR11 Pelagic Marine Bacteria." *PLOS ONE*  
1383 **6**(8): e23973. 10.1371/journal.pone.0023973  
1384 The\_UniProt\_Consortium (2022). "UniProt: the Universal Protein Knowledgebase in 2023."  
1385 *Nucleic Acids Research* **51**(D1): D523-D531. 10.1093/nar/gkac1052  
1386 Tinta, T., Z. Zhao, B. Bayer and G. J. Herndl (2023). "Jellyfish detritus supports niche  
1387 partitioning and metabolic interactions among pelagic marine bacteria." *Microbiome* **11**(1): 156.  
1388 10.1186/s40168-023-01598-8  
1389 Vries, G. E. d., N. Arfman, P. Terpstra and L. Dijkhuizen (1992). "Cloning, expression, and  
1390 sequence analysis of the *Bacillus methanolicus* C1 methanol dehydrogenase gene." *Journal of*  
1391 *Bacteriology* **174**(16): 5346-5353. doi:10.1128/jb.174.16.5346-5353.1992

1392 Wietz, M., M. López-Pérez, D. Sher, S. J. Biller and F. Rodriguez-Valera (2022). "Microbe  
1393 Profile: *Alteromonas macleodii* - a widespread, fast-responding, 'interactive' marine bacterium."  
1394 Microbiology (Reading) **168**(11). 10.1099/mic.0.001236  
1395 Zhang, H., T. Yohe, L. Huang, S. Entwistle, P. Wu, Z. Yang, P. K. Busk, Y. Xu and Y. Yin  
1396 (2018). "dbCAN2: a meta server for automated carbohydrate-active enzyme annotation."  
1397 Nucleic Acids Res **46**(W1): W95-w101. 10.1093/nar/gky418  
1398 Zhao, Z., F. Baltar and G. J. Herndl (2020). "Linking extracellular enzymes to phylogeny  
1399 indicates a predominantly particle-associated lifestyle of deep-sea prokaryotes." Science  
1400 Advances **6**(16): eaaz4354. doi:10.1126/sciadv.aaz4354  
1401 Zoccarato, L., D. Sher, T. Miki, D. Segrè and H.-P. Grossart (2022). "A comparative whole-  
1402 genome approach identifies bacterial traits for marine microbial interactions." Communications  
1403 Biology **5**(1): 276. 10.1038/s42003-022-03184-4  
1404
